# Supplementary material for: Comparison of survival in patients with low vs. intermediate prostate-specific antigen concentrations and development of a nomogram: a surveillance, epidemiology and end results program database study with external validation on a Chinese cohort
Source: PeerJ. 2025 Aug 4;13:e19823. doi: 10.7717/peerj.19823 (PMC12330820; doi:10.7717/peerj.19823)
Supplement: Supplemental Information 9 [file peerj-13-19823-s009.xls]

## Sheet: data
Age	PSA Lab Value Recode	Gleason score	race	T stage	N stage	M stage	overall survival (mouth)
59	0.161	8,9 or 10	Others	2	1	1	103
66	0.238	8,9 or 10	Others	2	0	0	69
62	0.4	8,9 or 10	Others	2	1	0	22
78	0.501	8,9 or 10	Others	1	0	0	43
67	0.58	8,9 or 10	Others	3	0	1	52
61	0.846	6 or 7	Others	1	0	0	80
74	0.859	6 or 7	Others	1	0	0	59
74	0.87	6 or 7	Others	2	0	0	30
58	0.946	8,9 or 10	Others	4	1	0	18
66	1.05	8,9 or 10	Others	2	0	0	51
66	1.13	6 or 7	Others	2	0	0	18
74	1.26	8,9 or 10	Others	2	0	1	47
70	1.26	8,9 or 10	Others	2	0	0	55
71	1.41	6 or 7	Others	2	0	0	16
78	1.41	6 or 7	Others	2	0	0	46
72	1.45	8,9 or 10	Others	2	0	0	15
67	1.46	6 or 7	Others	2	0	0	40
62	1.6	6 or 7	Others	2	0	0	14
72	1.86	6 or 7	Others	2	0	0	25
79	1.97	8,9 or 10	Others	4	1	1	22
47	1.98	8,9 or 10	Others	2	1	1	32
66	2.02	8,9 or 10	Others	4	1	1	49
78	2.05	6 or 7	Others	1	0	0	11
62	2.16	6 or 7	Others	2	0	0	15
50	2.32	6 or 7	Others	2	0	0	22
67	2.52	8,9 or 10	Others	3	0	0	57
74	2.6	6 or 7	Others	2	0	0	108
65	2.72	6 or 7	Others	1	0	0	24
64	2.93	6 or 7	Others	1	0	0	20
62	2.94	6 or 7	Others	2	0	0	12
71	3.06	6 or 7	Others	2	0	0	25
70	3.27	8,9 or 10	Others	2	0	0	40
67	3.35	8,9 or 10	Others	1	0	0	16
84	3.35	8,9 or 10	Others	2	0	0	73
83	3.5	6 or 7	Others	1	0	0	8
64	3.6	6 or 7	Others	4	0	0	33
73	3.78	6 or 7	Others	1	0	0	34
65	3.81	8,9 or 10	Others	2	0	0	10
81	4	8,9 or 10	Others	4	1	1	22
67	4	6 or 7	Others	2	0	0	63
83	4	8,9 or 10	Others	2	0	0	38
76	4.1	6 or 7	Others	2	0	0	9
76	4.11	8,9 or 10	Others	3	0	0	49
63	4.18	6 or 7	Others	2	0	0	78
75	4.2	6 or 7	Others	2	0	0	25
70	4.24	6 or 7	Others	2	0	0	57
69	4.3	6 or 7	Others	1	0	0	22
67	4.33	6 or 7	Others	1	0	0	28
76	4.46	6 or 7	Others	2	0	0	22
63	4.5	6 or 7	Others	2	0	0	17
56	4.58	6 or 7	Others	2	0	0	12
73	4.59	6 or 7	Others	1	0	0	49
62	4.67	6 or 7	Others	2	0	0	10
59	4.68	6 or 7	Others	2	0	0	14
71	4.7	6 or 7	Others	2	0	0	69
66	4.71	6 or 7	Others	1	0	0	25
65	4.75	6 or 7	Others	1	0	0	43
76	4.82	6 or 7	Others	2	0	0	26
61	4.83	6 or 7	Others	2	0	0	88
76	4.84	8,9 or 10	Others	2	0	0	43
65	4.85	8,9 or 10	Others	2	0	0	11
61	4.91	6 or 7	Others	2	0	0	17
65	4.99	6 or 7	Others	2	0	0	16
63	5	6 or 7	Others	2	0	0	29
65	5	6 or 7	Others	2	0	0	69
71	5.01	6 or 7	Others	1	0	0	38
69	5.05	6 or 7	Others	2	0	0	39
61	5.28	6 or 7	Others	2	0	0	32
59	5.35	6 or 7	Others	2	0	0	24
75	5.39	6 or 7	Others	2	0	0	12
78	5.43	6 or 7	Others	2	0	0	27
67	5.45	6 or 7	Others	2	0	0	22
79	5.47	8,9 or 10	Others	4	0	0	45
64	5.47	6 or 7	Others	2	0	0	48
75	5.48	8,9 or 10	Others	2	0	0	36
75	5.51	6 or 7	Others	1	0	0	10
59	5.54	6 or 7	Others	2	0	0	18
64	5.56	8,9 or 10	Others	2	0	0	12
71	5.65	6 or 7	Others	1	0	0	13
58	5.69	6 or 7	Others	2	0	0	0
74	5.71	6 or 7	Others	2	0	0	21
68	5.74	6 or 7	Others	2	0	0	72
64	5.77	6 or 7	Others	2	0	0	18
57	5.84	6 or 7	Others	2	0	0	29
68	5.85	6 or 7	Others	2	0	0	38
77	5.94	6 or 7	Others	1	0	0	46
84	5.95	6 or 7	Others	2	0	0	29
72	5.97	8,9 or 10	Others	2	0	0	56
75	5.99	8,9 or 10	Others	2	0	0	23
70	6	8,9 or 10	Others	2	0	0	12
60	6	6 or 7	Others	2	0	0	28
72	6.03	8,9 or 10	Others	2	0	0	20
67	6.1	6 or 7	Others	1	0	0	12
68	6.15	6 or 7	Others	1	0	0	33
56	6.16	6 or 7	Others	2	0	0	44
62	6.28	8,9 or 10	Others	2	0	0	23
67	6.4	6 or 7	Others	1	0	0	24
66	6.4	6 or 7	Others	1	0	0	34
77	6.45	8,9 or 10	Others	3	0	0	15
64	6.49	6 or 7	Others	2	0	0	14
73	6.53	8,9 or 10	Others	3	0	0	36
61	6.54	6 or 7	Others	2	0	0	27
60	6.55	8,9 or 10	Others	4	1	1	20
80	6.62	6 or 7	Others	2	0	0	12
75	6.64	6 or 7	Others	1	0	0	21
67	6.64	6 or 7	Others	2	0	0	27
67	6.69	6 or 7	Others	2	0	0	22
67	6.72	8,9 or 10	Others	3	1	0	29
76	6.74	6 or 7	Others	2	0	0	26
61	6.78	6 or 7	Others	1	0	0	25
60	6.85	8,9 or 10	Others	1	0	0	37
66	6.95	8,9 or 10	Others	2	0	0	35
64	6.95	6 or 7	Others	2	0	0	70
75	6.96	8,9 or 10	Others	1	0	0	25
67	6.99	6 or 7	Others	1	0	0	20
62	7	8,9 or 10	Others	2	0	0	10
65	7	6 or 7	Others	2	0	0	28
65	7	6 or 7	Others	4	1	0	19
72	7	6 or 7	Others	2	0	0	21
74	7	6 or 7	Others	2	0	0	52
75	7.04	6 or 7	Others	2	0	0	28
57	7.04	6 or 7	Others	1	0	0	61
74	7.13	6 or 7	Others	1	0	0	22
79	7.18	8,9 or 10	Others	2	0	0	15
51	7.2	6 or 7	Others	2	0	0	10
74	7.21	6 or 7	Others	2	0	0	24
59	7.27	6 or 7	Others	2	0	0	14
73	7.31	8,9 or 10	Others	2	0	0	22
64	7.36	8,9 or 10	Others	2	0	0	36
64	7.38	6 or 7	Others	2	0	0	80
57	7.5	8,9 or 10	Others	2	0	0	15
71	7.5	6 or 7	Others	1	0	0	20
64	7.55	8,9 or 10	Others	2	0	0	10
74	7.71	6 or 7	Others	2	0	0	13
63	7.72	6 or 7	Others	2	0	0	10
67	7.78	6 or 7	Others	1	0	0	25
60	7.84	6 or 7	Others	2	0	0	29
60	7.93	6 or 7	Others	2	0	0	59
70	7.96	6 or 7	Others	2	0	0	78
72	7.96	8,9 or 10	Others	2	0	0	39
59	7.97	6 or 7	Others	2	0	0	15
58	7.99	6 or 7	Others	2	0	0	44
64	8	6 or 7	Others	2	0	0	25
62	8	8,9 or 10	Others	1	0	0	32
71	8	8,9 or 10	Others	2	0	0	33
66	8	8,9 or 10	Others	2	0	0	29
69	8	6 or 7	Others	2	0	0	37
66	8	6 or 7	Others	2	0	0	64
82	8.04	6 or 7	Others	2	0	0	13
59	8.14	8,9 or 10	Others	2	0	0	17
76	8.31	8,9 or 10	Others	2	0	0	39
76	8.46	6 or 7	Others	2	0	0	34
74	8.506	6 or 7	Others	1	0	0	46
76	8.62	6 or 7	Others	1	0	0	47
72	8.62	6 or 7	Others	1	0	0	12
71	8.63	6 or 7	Others	2	0	0	73
63	8.65	6 or 7	Others	2	0	0	16
65	8.777	6 or 7	Others	3	0	0	50
68	8.84	6 or 7	Others	2	0	0	19
81	8.86	8,9 or 10	Others	2	0	0	13
66	8.9	8,9 or 10	Others	2	0	0	79
66	8.93	8,9 or 10	Others	2	0	0	48
80	8.95	6 or 7	Others	2	0	0	11
65	8.99	6 or 7	Others	3	0	0	46
73	9	8,9 or 10	Others	1	0	0	21
60	9.02	6 or 7	Others	2	0	0	69
67	9.03	8,9 or 10	Others	2	0	0	29
58	9.04	6 or 7	Others	1	0	0	75
64	9.05	6 or 7	Others	2	0	0	23
64	9.16	8,9 or 10	Others	2	0	1	30
69	9.25	8,9 or 10	Others	2	0	0	34
79	9.25	6 or 7	Others	2	0	0	34
65	9.37	6 or 7	Others	2	0	0	48
60	9.4	8,9 or 10	Others	2	0	0	12
74	9.4	6 or 7	Others	2	0	0	16
71	9.57	6 or 7	Others	2	0	0	13
72	9.61	8,9 or 10	Others	1	0	0	10
73	9.64	6 or 7	Others	2	0	0	44
72	9.66	6 or 7	Others	2	0	0	21
71	9.72	6 or 7	Others	1	0	0	27
65	9.77	6 or 7	Others	1	0	0	44
81	9.8	6 or 7	Others	3	0	0	27
79	9.8	6 or 7	Others	2	0	0	12
77	9.82	8,9 or 10	Others	2	0	0	15
62	9.85	8,9 or 10	Others	2	0	1	30
79	9.86	8,9 or 10	Others	2	0	0	21
66	9.86	6 or 7	Others	2	0	0	25
62	9.86	6 or 7	Others	2	0	0	32
68	9.9	6 or 7	Others	2	0	0	27
64	9.92	8,9 or 10	Others	4	0	0	54
56	9.92	8,9 or 10	Others	1	0	0	13
59	9.92	6 or 7	Others	2	0	0	14
61	9.94	6 or 7	Others	2	0	0	28
70	10	8,9 or 10	Others	1	0	0	64
76	10	8,9 or 10	Others	2	0	0	26
77	7.85	6 or 7	Others	2	0	0	19
63	0.242	8,9 or 10	Others	3	1	1	5
77	1.21	8,9 or 10	Others	4	1	1	16
63	3.84	8,9 or 10	Others	3	0	1	21
