# Supplementary material for: Comparison of survival in patients with low vs. intermediate prostate-specific antigen concentrations and development of a nomogram: a surveillance, epidemiology and end results program database study with external validation on a Chinese cohort
Source: PeerJ. 2025 Aug 4;13:e19823. doi: 10.7717/peerj.19823 (PMC12330820; doi:10.7717/peerj.19823)
Supplement: Supplemental Information 10 [file peerj-13-19823-s010.xlsx]

## Sheet: data
Age	Race recode	Gleason score	PSA Lab Value Recode	Death or not	overall survival (mouth)	T stage	N stage	M stage	local treatment
80-84	White	6	3.8	No	78	2	0	0	No
65-69	White	7	1.7	No	21	2	0	0	Yes
70-74	White	6	2.5	No	27	2	0	0	Yes
<65	White	6	3.1	No	35	1	0	0	Yes
70-74	White	6	3.4	No	99	1	0	0	Yes
<65	White	6	3.6	No	38	1	0	0	Yes
<65	White	6	3.9	No	89	2	0	0	Yes
<65	White	6	4	No	79	3	0	0	Yes
<65	White	7	4.1	No	25	2	0	0	Yes
<65	Others	6	4.2	No	95	1	0	0	Yes
<65	Black	6	4.3	No	47	2	0	0	Yes
75-79	White	7	4.4	No	69	2	0	0	Yes
<65	Black	7	4.5	No	81	1	0	0	Yes
<65	Others	6	4.6	No	44	2	0	0	Yes
70-74	White	8	4.6	No	94	1	0	0	Yes
<65	White	6	4.7	No	88	2	0	0	Yes
<65	Black	7	4.8	No	12	1	0	0	Yes
80-84	White	9	4.9	No	54	2	0	0	Yes
65-69	White	7	5	No	71	2	0	0	Yes
65-69	White	6	5.1	No	87	2	0	0	Yes
<65	White	6	5.2	No	75	1	0	0	Yes
75-79	White	7	5.3	No	53	1	0	0	Yes
<65	Black	7	5.4	No	83	1	0	0	Yes
<65	White	6	5.6	No	100	2	0	0	Yes
<65	White	7	5.7	No	21	1	0	0	Yes
65-69	White	9	5.8	No	100	1	0	0	Yes
<65	White	7	6	No	32	1	0	0	Yes
65-69	White	6	6	No	89	1	0	0	Yes
65-69	Others	7	6.2	No	70	2	0	0	Yes
70-74	White	7	6.4	No	72	2	0	0	Yes
75-79	White	7	6.5	Yes	80	2	0	0	Yes
<65	White	6	6.7	No	100	3	0	0	Yes
70-74	White	7	6.8	No	73	1	0	0	Yes
65-69	White	7	7	No	77	1	0	0	Yes
<65	White	8	7.2	No	30	2	0	0	Yes
70-74	White	7	7.5	No	22	1	0	0	Yes
<65	White	6	7.8	No	103	3	0	0	Yes
65-69	Others	6	8	No	18	3	0	0	Yes
<65	White	7	8.2	No	84	3	0	0	Yes
<65	White	7	8.5	No	99	2	0	0	Yes
75-79	White	8	8.7	No	72	1	0	0	Yes
<65	White	6	8.9	No	53	3	0	0	Yes
65-69	White	9	9.3	Yes	5	2	0	0	Yes
70-74	White	7	9.5	No	36	2	0	0	Yes
75-79	White	7	9.8	No	98	1	0	0	Yes
65-69	White	6	0.9	No	62	2	0	0	Yes
<65	White	6	2.3	No	22	1	0	0	Yes
<65	White	6	3	No	58	2	0	0	Yes
65-69	White	6	3.8	No	102	1	0	0	Yes
80-84	White	7	4.2	No	96	1	0	0	Yes
70-74	White	6	4.5	No	73	1	0	0	Yes
65-69	White	6	4.8	No	95	1	0	0	Yes
<65	White	6	5	No	23	1	0	0	Yes
70-74	White	6	5.2	No	103	2	0	0	Yes
80-84	Others	6	5.4	No	107	2	0	0	Yes
<65	White	6	5.5	No	13	1	0	0	Yes
70-74	White	6	5.7	No	46	1	0	0	Yes
75-79	White	6	5.9	No	73	2	0	0	Yes
70-74	Black	7	6.2	Yes	55	2	0	0	Yes
<65	White	6	6.4	No	42	1	0	0	Yes
<65	White	6	6.8	No	33	2	0	0	Yes
75-79	White	6	7	No	35	1	0	0	Yes
70-74	Others	6	7.2	No	93	1	0	0	Yes
65-69	White	6	7.4	No	28	1	0	0	Yes
70-74	White	7	7.7	No	86	1	0	0	Yes
75-79	White	6	8.1	No	85	1	0	0	Yes
75-79	White	6	8.7	No	42	1	0	0	Yes
<65	White	7	9.2	No	61	2	0	0	Yes
65-69	White	9	3.3	No	73	3	0	0	No
65-69	White	9	5.4	No	21	3	0	0	No
65-69	White	6	0.1	No	31	2	0	0	Yes
<65	White	8	1.4	No	35	2	0	0	Yes
65-69	White	6	2.2	No	15	2	0	0	Yes
<65	Black	7	3	No	42	2	0	0	Yes
<65	White	6	3.4	No	103	2	0	0	Yes
<65	White	6	3.6	No	35	2	0	0	Yes
75-79	White	8	3.8	No	74	2	0	0	Yes
70-74	White	9	4	No	104	2	0	0	Yes
<65	Black	6	4.1	No	101	2	0	0	Yes
<65	White	7	4.2	No	97	3	0	0	Yes
65-69	White	6	4.3	No	29	2	0	0	Yes
<65	White	6	4.4	No	90	3	0	0	Yes
<65	White	6	4.4	No	105	1	0	0	Yes
<65	Black	7	4.5	No	64	3	0	0	Yes
<65	White	6	4.6	No	78	2	0	0	Yes
65-69	White	7	4.7	No	107	2	0	0	Yes
<65	White	7	4.8	No	101	2	0	0	Yes
65-69	White	7	4.9	No	52	2	0	0	Yes
65-69	White	6	5	No	61	1	0	0	Yes
65-69	White	8	5	No	17	2	0	0	Yes
65-69	White	7	5.1	No	82	2	0	0	Yes
75-79	White	8	5.2	No	44	2	0	0	Yes
70-74	White	7	5.4	No	107	1	0	0	Yes
<65	White	7	5.5	No	43	3	0	0	Yes
65-69	White	7	5.6	No	94	1	0	0	Yes
65-69	White	7	5.7	No	34	2	0	0	Yes
65-69	White	7	5.8	No	18	3	0	0	Yes
<65	White	6	5.9	No	72	1	0	0	Yes
75-79	White	6	6	No	57	1	0	0	Yes
75-79	White	7	6.1	No	18	2	0	0	Yes
<65	White	7	6.2	No	31	1	0	0	Yes
65-69	White	7	6.4	No	99	2	0	0	Yes
<65	White	7	6.5	No	2	2	0	0	Yes
65-69	White	6	6.7	No	85	1	0	0	Yes
<65	White	6	6.8	No	80	2	0	0	Yes
<65	White	6	6.9	No	2	1	0	0	Yes
<65	White	6	7	No	23	3	0	0	Yes
<65	Black	6	7.2	No	12	1	0	0	Yes
65-69	White	6	7.5	No	97	1	0	0	Yes
70-74	White	7	7.7	No	95	2	0	0	Yes
70-74	White	6	7.9	No	68	2	0	0	Yes
65-69	Others	9	8.1	No	15	1	0	0	Yes
<65	White	7	8.4	No	56	2	0	0	Yes
80-84	White	7	8.6	No	82	1	0	0	Yes
65-69	White	7	9	Yes	15	3	0	0	Yes
<65	White	7	9.2	No	35	2	0	0	Yes
75-79	Black	7	9.4	No	86	1	0	0	Yes
<65	White	7	9.7	No	66	2	0	0	Yes
70-74	White	7	10	No	95	2	0	0	Yes
75-79	White	7	1.2	No	75	2	0	0	Yes
<65	White	6	2.6	No	49	1	0	0	Yes
75-79	White	6	3.1	No	29	1	0	0	Yes
65-69	Black	6	4.1	Yes	20	1	0	0	Yes
<65	Black	6	4.5	No	83	1	0	0	Yes
<65	White	7	4.7	No	105	1	0	0	Yes
<65	White	6	5	No	95	1	0	0	Yes
<65	White	7	5.2	No	31	1	0	0	Yes
65-69	White	7	5.4	No	106	1	0	0	Yes
70-74	White	7	5.7	No	41	2	0	0	Yes
<65	White	6	5.9	No	51	1	0	0	Yes
65-69	White	8	6.2	Yes	13	2	1	1	Yes
75-79	White	6	6.6	No	96	1	0	0	Yes
65-69	White	7	7	No	13	1	0	0	Yes
65-69	Black	7	7.3	No	35	1	0	0	Yes
65-69	White	6	7.5	No	24	1	0	0	Yes
70-74	White	6	8.1	No	32	1	0	0	Yes
>85	White	6	8.4	Yes	84	1	0	0	Yes
<65	White	7	9	No	33	2	0	0	Yes
<65	Black	7	4.6	No	46	3	0	0	No
<65	White	9	9	No	55	3	1	0	No
65-69	White	9	0.5	No	29	3	0	0	Yes
<65	White	7	1.7	No	13	2	0	0	Yes
65-69	Black	6	2.4	No	106	2	0	0	Yes
70-74	White	7	2.8	No	34	1	0	0	Yes
70-74	White	9	3.1	No	30	1	0	0	Yes
<65	Black	6	3.4	No	38	1	0	0	Yes
<65	White	7	3.8	No	90	2	0	0	Yes
<65	White	7	4	No	93	2	0	0	Yes
<65	White	7	4.1	No	80	1	0	0	Yes
<65	Black	6	4.2	No	36	2	0	0	Yes
<65	White	6	4.3	No	92	1	0	0	Yes
<65	White	6	4.4	No	78	2	0	0	Yes
<65	Black	9	4.5	Yes	47	2	0	0	Yes
65-69	White	7	4.5	No	55	1	0	0	Yes
<65	White	6	4.6	No	27	2	0	0	Yes
65-69	Black	7	4.7	No	103	2	0	0	Yes
65-69	Black	6	4.8	No	63	1	0	0	Yes
<65	Black	7	4.9	No	34	1	0	0	Yes
75-79	White	7	5	No	32	1	0	0	Yes
<65	White	6	5.1	No	48	2	0	0	Yes
65-69	Others	7	5.2	No	92	2	0	0	Yes
65-69	White	6	5.2	No	106	1	0	0	Yes
65-69	White	6	5.3	Yes	12	1	0	0	Yes
70-74	White	7	5.4	No	50	2	0	0	Yes
<65	Others	6	5.5	No	2	2	0	0	Yes
<65	Black	7	5.6	No	24	1	0	0	Yes
65-69	White	7	5.7	No	71	1	0	0	Yes
<65	White	7	5.8	No	80	1	0	0	Yes
70-74	White	7	5.9	No	32	1	0	0	Yes
70-74	White	6	6	Yes	39	3	0	0	Yes
70-74	White	9	6.2	No	64	2	0	0	Yes
70-74	White	8	6.3	No	33	2	0	0	Yes
<65	White	7	6.4	No	36	2	0	0	Yes
65-69	White	7	6.5	No	91	2	0	0	Yes
<65	White	9	6.6	No	87	1	0	0	Yes
70-74	White	6	6.8	No	49	1	0	0	Yes
<65	White	7	6.9	No	106	3	1	0	Yes
75-79	White	7	7	No	22	1	0	0	Yes
75-79	White	7	7.2	No	25	1	0	0	Yes
<65	White	7	7.4	No	21	3	0	0	Yes
<65	Black	7	7.5	No	93	2	0	0	Yes
65-69	White	6	7.8	Yes	12	2	0	0	Yes
65-69	White	6	8	No	92	2	0	0	Yes
80-84	White	7	8.1	No	25	2	0	0	Yes
65-69	Others	6	8.4	No	77	2	0	0	Yes
65-69	White	7	8.5	No	74	1	0	0	Yes
65-69	White	7	8.7	No	47	1	0	0	Yes
80-84	White	6	9	No	107	1	0	0	Yes
70-74	White	7	9.3	No	50	2	0	0	Yes
65-69	White	7	9.7	Yes	14	1	0	0	Yes
75-79	White	7	10	No	39	2	0	0	Yes
<65	White	6	1.5	No	70	2	0	0	Yes
65-69	White	7	2.9	No	45	1	0	0	Yes
<65	White	6	3.6	No	95	1	0	0	Yes
<65	White	6	4	No	42	1	0	0	Yes
80-84	White	6	4.3	No	59	1	0	0	Yes
<65	White	6	4.7	No	100	2	0	0	Yes
75-79	White	7	4.9	No	96	2	0	0	Yes
<65	White	6	5.1	No	24	1	0	0	Yes
<65	Others	6	5.5	No	17	1	0	0	Yes
65-69	White	7	5.7	No	38	1	0	0	Yes
<65	White	6	6	No	34	1	0	0	Yes
75-79	White	6	6.2	No	39	1	0	0	Yes
<65	White	6	6.7	No	56	1	0	0	Yes
65-69	White	6	7.2	No	20	1	0	0	Yes
70-74	White	6	7.7	No	25	1	0	0	Yes
<65	White	6	8.3	No	50	2	0	0	Yes
75-79	Black	6	9.2	No	71	1	0	0	Yes
<65	White	6	3.9	No	59	3	0	0	No
<65	White	9	5.4	No	31	3	1	1	No
<65	White	6	0.9	No	55	2	0	0	Yes
<65	Black	6	2.1	No	81	2	0	0	Yes
<65	Black	7	2.9	No	103	1	0	0	Yes
70-74	White	7	3.1	No	27	2	0	0	Yes
<65	White	6	3.5	No	92	2	0	0	Yes
75-79	White	7	3.8	No	98	1	0	0	Yes
65-69	White	7	4	No	103	2	0	0	Yes
70-74	White	7	4.1	No	96	2	0	0	Yes
65-69	White	7	4.2	No	80	1	0	0	Yes
<65	Black	7	4.2	No	22	1	0	0	Yes
<65	White	7	4.4	Yes	8	3	0	0	Yes
<65	White	7	4.5	No	99	2	0	0	Yes
<65	White	8	4.5	No	45	2	0	0	Yes
65-69	White	7	4.6	No	76	2	0	0	Yes
75-79	White	6	4.7	No	48	2	0	0	Yes
<65	White	6	4.8	No	82	1	0	0	Yes
<65	White	7	4.9	No	43	2	0	0	Yes
<65	Others	7	5	No	37	2	0	0	Yes
<65	White	7	5.1	No	42	3	0	0	Yes
<65	White	6	5.2	No	95	2	0	0	Yes
<65	Black	7	5.3	No	60	2	0	0	Yes
65-69	White	6	5.4	No	37	1	0	0	Yes
<65	White	6	5.5	No	66	2	0	0	Yes
70-74	Others	7	5.6	No	34	2	0	0	Yes
<65	White	6	5.8	No	39	2	0	0	Yes
70-74	White	7	5.9	No	23	2	0	0	Yes
75-79	White	7	6	No	51	2	0	0	Yes
80-84	White	8	6.1	Yes	25	1	0	0	Yes
65-69	White	9	6.3	No	48	1	0	0	Yes
65-69	White	7	6.4	No	72	1	0	0	Yes
<65	White	6	6.5	No	12	1	0	0	Yes
65-69	White	6	6.6	No	103	2	0	0	Yes
<65	White	7	6.7	No	87	3	0	0	Yes
<65	White	8	6.9	No	34	3	0	0	Yes
<65	White	7	7	No	85	2	0	0	Yes
<65	White	7	7.1	No	106	2	0	0	Yes
<65	White	9	7.4	No	18	3	0	0	Yes
75-79	White	7	7.6	Yes	52	1	0	0	Yes
70-74	White	7	7.8	No	60	1	0	0	Yes
65-69	White	6	8	No	101	2	0	0	Yes
<65	White	6	8.1	No	66	3	0	0	Yes
70-74	Black	7	8.3	No	20	2	0	0	Yes
75-79	White	7	8.6	No	24	1	0	0	Yes
65-69	White	7	8.9	No	96	2	0	0	Yes
70-74	White	7	9.2	No	60	1	0	0	Yes
65-69	White	9	9.5	No	48	3	0	0	Yes
70-74	White	9	10	No	48	1	0	0	Yes
<65	White	6	0.8	No	84	1	0	0	Yes
<65	White	6	1.9	No	106	2	0	0	Yes
75-79	White	6	2.6	No	42	1	0	0	Yes
80-84	White	6	3.5	No	107	1	0	0	Yes
65-69	White	6	4.1	No	94	1	0	0	Yes
<65	White	6	4.4	No	30	1	0	0	Yes
75-79	White	6	4.8	No	73	1	0	0	Yes
65-69	Black	6	5	No	24	1	0	0	Yes
<65	Black	6	5.2	No	62	1	0	0	Yes
65-69	White	6	5.4	No	33	1	0	0	Yes
70-74	Black	7	5.6	No	35	1	0	0	Yes
70-74	White	6	5.7	No	81	1	0	0	Yes
<65	White	6	5.9	No	46	1	0	0	Yes
<65	White	6	6.2	No	22	1	0	0	Yes
75-79	White	6	6.7	No	103	1	0	0	Yes
<65	White	6	6.9	Yes	29	1	0	0	Yes
70-74	White	6	7.3	No	96	1	0	0	Yes
65-69	Black	7	7.6	No	34	1	0	0	Yes
65-69	Black	6	8.4	No	48	1	0	0	Yes
<65	White	6	9	No	57	1	0	0	Yes
75-79	White	7	9.7	Yes	49	1	0	0	Yes
<65	White	7	3.3	No	73	3	0	0	No
<65	White	8	10	No	33	3	1	0	No
<65	White	7	1.1	No	33	2	0	0	Yes
65-69	White	6	1.9	No	88	2	0	0	Yes
<65	White	7	2.4	No	100	2	0	0	Yes
<65	White	6	3.1	No	19	2	0	0	Yes
65-69	White	7	3.4	Yes	76	2	0	0	Yes
<65	Black	6	3.7	No	42	1	0	0	Yes
<65	White	7	3.9	No	7	2	0	0	Yes
65-69	White	7	4.1	No	97	1	0	0	Yes
<65	White	7	4.1	No	31	1	0	0	Yes
<65	White	6	4.2	No	70	3	0	0	Yes
<65	White	6	4.3	No	47	2	0	0	Yes
65-69	White	6	4.4	No	64	2	0	0	Yes
<65	White	7	4.5	No	71	2	0	0	Yes
65-69	White	6	4.6	No	91	1	0	0	Yes
<65	White	7	4.7	Yes	25	3	0	0	Yes
65-69	Black	6	4.7	No	106	2	0	0	Yes
<65	Others	6	4.8	No	69	1	0	0	Yes
<65	White	6	4.9	No	64	2	0	0	Yes
65-69	White	7	5	No	79	2	0	0	Yes
<65	White	7	5.1	No	87	1	0	0	Yes
<65	White	6	5.2	No	23	1	0	0	Yes
70-74	White	9	5.3	Yes	62	1	0	0	Yes
65-69	White	7	5.4	No	45	2	0	0	Yes
<65	White	7	5.5	No	43	1	0	0	Yes
<65	Others	6	5.6	No	101	2	0	0	Yes
65-69	White	7	5.7	No	93	2	0	0	Yes
<65	Others	9	5.8	No	87	2	0	0	Yes
70-74	White	6	5.9	Yes	89	1	0	0	Yes
<65	White	6	6	No	100	1	0	0	Yes
<65	Others	9	6.1	No	93	1	0	0	Yes
<65	White	7	6.2	No	61	3	0	0	Yes
<65	White	6	6.3	No	105	1	0	0	Yes
70-74	White	8	6.4	No	30	2	0	0	Yes
75-79	Others	7	6.6	No	103	1	0	0	Yes
65-69	White	6	6.7	No	48	1	0	0	Yes
<65	White	8	6.9	No	57	2	0	0	Yes
<65	White	7	7	No	97	1	0	0	Yes
70-74	White	6	7.3	No	50	1	0	0	Yes
65-69	White	7	7.5	No	33	1	0	0	Yes
<65	White	9	7.7	No	28	3	1	1	Yes
<65	White	7	7.8	No	24	2	0	0	Yes
75-79	White	7	8	No	65	2	0	0	Yes
65-69	White	6	8.3	No	107	1	0	0	Yes
<65	White	6	8.5	No	72	3	0	0	Yes
<65	White	9	8.8	No	51	2	0	0	Yes
<65	Black	7	9	No	105	2	0	0	Yes
75-79	Others	8	9.2	No	24	1	0	0	Yes
70-74	White	8	9.5	No	17	1	0	0	Yes
65-69	White	8	10	No	23	1	0	0	Yes
<65	White	6	2.1	No	51	2	0	0	Yes
<65	White	6	2.9	No	33	1	0	0	Yes
<65	Black	7	3.7	No	49	1	0	0	Yes
<65	White	6	4.2	No	18	1	0	0	Yes
<65	White	6	4.5	No	93	1	0	0	Yes
<65	White	6	4.8	No	24	1	0	0	Yes
65-69	White	7	5	No	33	1	0	0	Yes
<65	White	6	5.3	No	72	1	0	0	Yes
<65	Black	6	5.4	No	107	1	0	0	Yes
70-74	Others	7	5.7	No	18	1	0	0	Yes
70-74	White	6	6.1	No	107	1	0	0	Yes
65-69	White	6	6.4	No	42	1	0	0	Yes
80-84	White	7	6.7	Yes	52	2	0	0	Yes
65-69	White	7	7.1	No	34	1	0	0	Yes
<65	White	6	7.3	No	103	1	0	0	Yes
<65	Black	7	7.6	No	29	1	0	0	Yes
<65	Black	6	8.3	No	28	1	0	0	Yes
70-74	White	8	9.1	No	51	2	0	0	Yes
75-79	Black	7	9.6	No	69	1	0	0	Yes
<65	White	6	4.7	No	42	2	0	0	No
65-69	Others	7	8.4	No	69	3	0	0	No
<65	White	8	1.3	No	65	2	0	0	Yes
65-69	White	9	2.3	No	18	3	0	0	Yes
<65	White	6	2.9	No	34	2	0	0	Yes
<65	White	7	3.3	No	81	2	0	0	Yes
<65	White	7	3.6	No	42	2	0	0	Yes
65-69	White	7	3.8	No	71	2	0	0	Yes
<65	White	7	4	No	67	2	0	0	Yes
75-79	White	7	4.1	No	63	1	0	0	Yes
65-69	White	7	4.2	No	22	2	0	0	Yes
<65	Black	9	4.3	No	52	3	0	0	Yes
65-69	White	6	4.3	No	58	1	0	0	Yes
<65	White	7	4.5	No	82	2	0	0	Yes
<65	White	6	4.6	No	99	2	0	0	Yes
65-69	White	9	4.7	No	98	3	0	0	Yes
75-79	White	7	4.8	No	62	2	0	0	Yes
<65	Others	7	4.8	No	107	2	0	0	Yes
<65	White	7	4.9	No	56	2	0	0	Yes
<65	White	7	5	No	24	3	0	0	Yes
70-74	White	7	5.1	No	102	1	0	0	Yes
<65	Others	7	5.2	No	86	2	0	0	Yes
<65	White	7	5.2	No	105	3	0	0	Yes
70-74	White	6	5.3	No	81	1	0	0	Yes
<65	White	8	5.5	No	26	2	0	0	Yes
65-69	White	6	5.6	No	86	2	0	0	Yes
65-69	White	6	5.7	No	102	2	0	0	Yes
<65	White	7	5.8	No	75	1	0	0	Yes
70-74	White	7	5.9	No	76	1	0	0	Yes
<65	White	6	6	No	87	2	0	0	Yes
<65	Others	8	6.2	No	62	2	0	0	Yes
70-74	White	7	6.3	No	93	1	0	0	Yes
65-69	White	7	6.4	No	47	1	0	0	Yes
<65	White	7	6.6	No	14	1	0	0	Yes
<65	White	6	6.8	No	80	2	0	0	Yes
70-74	Others	6	6.9	No	42	2	0	0	Yes
65-69	White	6	7	No	75	1	0	0	Yes
75-79	White	7	7.1	No	42	1	0	0	Yes
<65	White	7	7.3	No	45	3	0	0	Yes
65-69	White	6	7.4	No	5	3	0	0	Yes
65-69	White	7	7.6	No	28	1	0	0	Yes
<65	White	6	7.8	No	80	2	0	0	Yes
<65	Black	6	8	No	94	3	0	0	Yes
70-74	Black	9	8.2	No	24	1	0	0	Yes
65-69	White	7	8.5	No	76	2	0	0	Yes
70-74	White	8	8.7	No	45	1	0	0	Yes
70-74	Black	6	9	No	103	1	0	0	Yes
<65	White	7	9.2	No	6	2	0	0	Yes
65-69	Black	7	9.6	No	23	2	0	0	Yes
75-79	Others	9	0.1	No	58	3	0	1	Yes
<65	White	6	1.6	No	46	1	0	0	Yes
80-84	White	7	2.6	No	45	1	0	0	Yes
75-79	White	7	3.2	No	85	1	0	0	Yes
65-69	White	6	3.9	No	86	1	0	0	Yes
70-74	White	6	4.3	No	85	1	0	0	Yes
>85	White	6	4.5	Yes	90	1	0	0	Yes
75-79	Black	8	4.6	Yes	71	1	0	0	Yes
75-79	White	6	5	No	20	2	0	0	Yes
<65	White	6	5.3	No	77	1	0	0	Yes
65-69	Others	6	5.4	No	71	2	0	0	Yes
<65	White	6	5.5	No	15	1	0	0	Yes
70-74	White	7	5.9	No	92	1	0	0	Yes
65-69	White	6	6.2	No	71	2	0	0	Yes
<65	Others	6	6.5	No	42	1	0	0	Yes
70-74	White	6	6.7	No	92	1	0	0	Yes
<65	White	7	7.3	No	26	2	0	0	Yes
70-74	White	7	7.9	No	23	1	0	0	Yes
65-69	White	6	8.3	No	34	1	0	0	Yes
65-69	White	6	9.2	No	23	1	0	0	Yes
<65	White	7	9.8	No	41	2	0	0	Yes
<65	White	8	4.3	No	56	3	0	0	No
<65	White	7	1.2	Yes	22	2	0	0	Yes
75-79	White	8	2	No	92	3	0	0	Yes
65-69	White	6	2.5	No	54	2	0	0	Yes
<65	White	6	3	No	94	2	0	0	Yes
70-74	White	7	3.4	No	105	2	0	0	Yes
<65	White	6	3.6	No	11	2	0	0	Yes
70-74	White	7	3.9	No	101	3	0	0	Yes
65-69	White	6	4	No	68	2	0	0	Yes
<65	Black	7	4.1	No	99	2	0	0	Yes
<65	Black	6	4.2	No	6	2	0	0	Yes
<65	White	7	4.3	No	53	2	0	0	Yes
<65	White	6	4.4	No	101	2	0	0	Yes
70-74	White	7	4.5	No	72	1	0	0	Yes
<65	White	7	4.6	No	79	2	0	0	Yes
<65	White	7	4.7	No	48	1	0	0	Yes
65-69	Black	9	4.8	No	19	1	0	0	Yes
70-74	White	9	4.9	No	94	3	0	0	Yes
<65	White	6	4.9	No	45	2	0	0	Yes
75-79	White	6	5	No	19	1	0	0	Yes
<65	White	6	5.1	No	97	1	0	0	Yes
65-69	White	7	5.2	No	50	1	0	0	Yes
65-69	White	8	5.3	No	95	3	0	0	Yes
<65	White	7	5.4	No	12	1	0	0	Yes
65-69	Black	8	5.5	Yes	57	3	0	0	Yes
65-69	White	8	5.6	No	39	2	1	0	Yes
<65	Others	6	5.7	No	24	2	0	0	Yes
<65	Black	6	5.8	No	42	1	0	0	Yes
65-69	Others	7	5.9	No	90	2	0	0	Yes
<65	White	7	6	No	27	3	0	0	Yes
65-69	White	7	6.1	No	3	1	0	0	Yes
65-69	White	7	6.2	No	56	2	0	0	Yes
<65	White	7	6.3	No	77	1	0	0	Yes
<65	White	6	6.4	No	70	2	0	0	Yes
<65	White	7	6.5	No	87	3	0	0	Yes
<65	White	6	6.7	No	82	3	0	0	Yes
70-74	Black	6	6.8	No	75	2	0	0	Yes
65-69	White	7	7	No	91	1	0	0	Yes
<65	Black	7	7.1	No	100	2	0	0	Yes
70-74	White	6	7.4	No	40	2	0	0	Yes
70-74	White	7	7.5	Yes	24	2	0	0	Yes
75-79	White	8	7.7	No	85	2	0	0	Yes
<65	White	8	7.9	No	34	2	0	0	Yes
65-69	Black	6	8	Yes	49	3	0	0	Yes
<65	White	6	8.2	No	88	2	0	0	Yes
75-79	White	7	8.5	No	74	3	0	0	Yes
<65	White	8	8.7	No	42	2	0	0	Yes
<65	White	7	8.9	No	42	2	0	0	Yes
65-69	Black	9	9.2	No	36	2	0	0	Yes
<65	White	7	9.5	No	15	1	0	0	Yes
75-79	White	7	9.8	No	94	1	0	0	Yes
<65	White	6	0.5	No	25	1	0	0	Yes
70-74	White	6	1.3	No	38	1	0	0	Yes
75-79	White	6	2.6	No	23	1	0	0	Yes
<65	White	6	3.6	No	32	1	0	0	Yes
<65	Black	7	4.1	No	104	1	0	0	Yes
<65	Others	6	4.4	No	83	1	0	0	Yes
<65	Others	6	4.6	No	23	1	0	0	Yes
<65	White	7	4.9	No	58	1	0	0	Yes
65-69	Black	7	5.1	No	63	1	0	0	Yes
<65	Others	7	5.4	No	68	2	0	0	Yes
65-69	Others	6	5.6	No	89	2	0	0	Yes
75-79	White	7	6.1	No	94	1	0	0	Yes
65-69	White	6	6.5	No	18	1	0	0	Yes
65-69	White	7	6.9	No	75	1	0	0	Yes
70-74	White	6	7.1	Yes	40	1	0	0	Yes
<65	White	6	7.4	No	16	1	0	0	Yes
>85	White	6	7.9	Yes	93	1	0	0	Yes
<65	Others	6	8.7	No	77	2	0	0	Yes
<65	Others	6	9.4	No	59	1	0	0	Yes
75-79	White	7	5.6	No	34	3	0	0	No
<65	White	7	8.4	No	69	3	0	0	No
<65	Black	6	0.9	No	24	1	0	0	Yes
<65	White	6	1.5	No	61	2	0	0	Yes
<65	White	7	2.4	No	85	2	0	0	Yes
70-74	Black	7	2.9	No	56	2	0	0	Yes
70-74	White	7	3.2	No	101	2	0	0	Yes
<65	White	6	3.4	No	82	2	0	0	Yes
75-79	White	9	3.7	No	55	2	0	0	Yes
70-74	Black	9	3.9	No	35	2	0	0	Yes
<65	White	7	4	No	51	2	0	0	Yes
65-69	White	6	4.1	No	97	2	0	0	Yes
<65	White	7	4.3	No	63	2	0	0	Yes
65-69	White	7	4.4	No	14	1	0	0	Yes
<65	White	7	4.5	No	106	2	0	0	Yes
<65	Black	6	4.5	No	50	1	0	0	Yes
<65	Others	6	4.6	No	72	2	0	0	Yes
70-74	White	6	4.7	No	99	3	0	0	Yes
65-69	White	7	4.8	No	15	2	0	0	Yes
<65	White	6	4.9	No	50	1	0	0	Yes
<65	White	7	5	No	20	1	0	0	Yes
65-69	White	7	5	No	15	1	0	0	Yes
75-79	White	7	5.1	No	57	1	0	0	Yes
<65	Black	7	5.2	No	101	2	0	0	Yes
<65	White	7	5.3	No	54	1	0	0	Yes
<65	White	6	5.4	No	32	1	0	0	Yes
<65	White	7	5.5	No	28	2	0	0	Yes
70-74	White	6	5.6	No	76	1	0	0	Yes
<65	White	6	5.7	Yes	96	1	0	0	Yes
70-74	White	7	5.8	No	84	1	0	0	Yes
<65	White	8	5.9	No	20	2	0	0	Yes
<65	White	6	6	No	88	2	0	0	Yes
70-74	White	9	6.2	No	70	1	0	0	Yes
80-84	White	9	6.3	No	73	1	0	0	Yes
70-74	White	6	6.4	No	80	1	0	0	Yes
75-79	White	7	6.5	No	31	2	0	0	Yes
<65	White	7	6.7	No	91	2	0	0	Yes
<65	White	6	6.8	No	49	2	0	0	Yes
<65	White	7	6.9	No	14	2	0	0	Yes
65-69	White	8	7.2	No	22	2	0	0	Yes
<65	Black	7	7.4	No	29	2	0	0	Yes
70-74	White	7	7.6	Yes	9	2	0	0	Yes
70-74	White	7	7.8	No	79	3	0	0	Yes
65-69	White	6	7.9	No	106	2	0	0	Yes
70-74	Black	7	8.1	No	21	2	0	0	Yes
<65	Black	6	8.4	No	68	2	0	0	Yes
<65	White	7	8.8	No	50	3	0	0	Yes
<65	Black	6	9	No	103	2	0	0	Yes
<65	White	7	9.2	No	26	2	0	0	Yes
<65	Black	9	9.5	No	15	2	0	0	Yes
70-74	White	8	9.8	No	81	1	0	0	Yes
70-74	White	6	0.1	No	43	1	0	0	Yes
65-69	White	6	2.3	Yes	31	1	0	0	Yes
70-74	White	7	3.3	Yes	26	1	0	0	Yes
80-84	White	6	4.1	No	92	1	0	0	Yes
65-69	Black	7	4.3	No	45	2	0	0	Yes
70-74	White	7	4.5	No	61	1	0	0	Yes
<65	White	6	4.8	No	16	1	0	0	Yes
<65	White	6	5	Yes	6	1	0	0	Yes
>85	White	7	5.4	No	57	1	0	0	Yes
65-69	White	7	5.5	No	20	1	0	0	Yes
65-69	White	7	5.8	No	74	1	0	0	Yes
65-69	Black	6	6.1	No	94	1	0	0	Yes
65-69	White	6	6.3	No	72	2	0	0	Yes
<65	White	6	6.7	No	85	1	0	0	Yes
<65	White	6	7	Yes	36	1	0	0	Yes
80-84	White	7	7.3	No	33	4	0	0	Yes
<65	White	6	7.7	No	26	1	0	0	Yes
75-79	White	6	8.5	Yes	31	1	0	0	Yes
75-79	White	9	9	Yes	36	2	0	1	Yes
65-69	White	8	3.1	Yes	65	3	0	0	No
<65	White	7	6.8	No	39	2	0	0	No
<65	White	6	0.6	No	26	2	0	0	Yes
<65	White	6	1.5	No	54	2	0	0	Yes
<65	White	7	2.4	No	90	2	0	0	Yes
<65	White	7	2.9	No	6	2	0	0	Yes
<65	Others	7	3.3	No	34	2	0	0	Yes
<65	White	7	3.6	No	34	1	0	0	Yes
<65	Others	9	3.8	No	75	3	0	0	Yes
<65	White	6	4	No	107	2	0	0	Yes
65-69	White	6	4.1	No	49	2	0	0	Yes
<65	White	7	4.2	No	78	2	0	0	Yes
<65	Black	7	4.3	Yes	34	2	0	0	Yes
75-79	White	8	4.4	Yes	27	1	0	0	Yes
65-69	Others	7	4.5	No	47	2	0	0	Yes
<65	Others	7	4.6	No	22	2	0	0	Yes
<65	White	6	4.6	No	95	1	0	0	Yes
65-69	White	7	4.8	No	68	1	0	0	Yes
70-74	White	6	4.9	No	72	2	0	0	Yes
65-69	White	7	5	No	68	2	0	0	Yes
<65	White	7	5	No	25	1	0	0	Yes
<65	Black	9	5.1	No	11	2	0	0	Yes
65-69	White	7	5.2	No	23	1	0	0	Yes
75-79	White	9	5.3	Yes	64	3	0	0	Yes
65-69	White	6	5.4	No	69	2	0	0	Yes
70-74	White	6	5.5	No	98	1	0	0	Yes
75-79	White	9	5.6	No	30	1	0	0	Yes
70-74	Others	6	5.7	No	32	3	0	0	Yes
<65	White	7	5.8	No	101	2	0	0	Yes
75-79	White	6	6	No	51	2	0	0	Yes
65-69	White	6	6.1	No	3	2	0	0	Yes
<65	Black	6	6.2	No	29	1	0	0	Yes
65-69	White	8	6.4	No	23	2	0	0	Yes
<65	White	6	6.5	No	22	2	0	0	Yes
<65	Others	6	6.7	No	80	2	0	0	Yes
65-69	White	7	6.8	No	32	2	0	0	Yes
65-69	White	7	6.9	No	39	2	0	0	Yes
75-79	White	7	7	No	25	2	0	0	Yes
<65	White	7	7.2	No	22	2	0	0	Yes
65-69	White	6	7.4	No	36	2	0	0	Yes
75-79	White	6	7.7	No	82	1	0	0	Yes
75-79	White	7	7.9	Yes	48	2	0	0	Yes
<65	White	7	8.1	No	40	2	0	0	Yes
70-74	Others	7	8.4	No	64	1	0	0	Yes
<65	Black	7	8.6	No	33	1	0	0	Yes
70-74	White	6	8.8	No	47	2	0	0	Yes
<65	White	6	9	No	97	2	0	0	Yes
65-69	Others	8	9.3	Yes	60	2	0	0	Yes
75-79	White	9	9.6	No	39	2	0	0	Yes
<65	Black	7	10	Yes	67	1	0	0	Yes
70-74	Black	6	1.3	Yes	38	2	0	0	Yes
70-74	White	8	2.7	No	106	3	0	0	Yes
80-84	White	7	3.4	No	95	1	0	0	Yes
<65	White	6	4	No	78	1	0	0	Yes
65-69	White	7	4.3	Yes	36	1	0	0	Yes
<65	Black	6	4.7	No	38	1	0	0	Yes
<65	Black	6	4.9	No	14	1	0	0	Yes
65-69	White	6	5.1	No	48	1	0	0	Yes
80-84	White	7	5.3	Yes	59	1	0	0	Yes
<65	White	6	5.5	No	93	1	0	0	Yes
65-69	Black	7	5.7	No	80	1	0	0	Yes
<65	White	6	5.9	No	17	1	0	0	Yes
70-74	White	6	6.2	No	80	1	0	0	Yes
<65	White	7	6.4	No	69	1	0	0	Yes
75-79	White	7	7	Yes	14	1	0	0	Yes
<65	White	6	7.3	No	35	1	0	0	Yes
<65	White	6	7.6	No	67	1	0	0	Yes
65-69	White	6	7.9	Yes	58	1	0	0	Yes
70-74	White	6	8.5	No	29	1	0	0	Yes
<65	White	6	9.5	No	16	1	0	0	Yes
<65	White	7	4.7	No	41	3	1	0	No
<65	White	7	1.3	No	28	2	0	0	Yes
<65	White	7	2.1	No	80	2	0	0	Yes
65-69	White	7	2.7	No	106	2	0	0	Yes
80-84	White	7	3.1	No	78	2	0	0	Yes
65-69	White	6	3.3	No	106	1	0	0	Yes
70-74	White	7	3.5	No	96	1	0	0	Yes
<65	White	6	3.8	No	86	2	0	0	Yes
65-69	White	6	4	No	21	2	0	0	Yes
<65	White	6	4.1	No	102	2	0	0	Yes
<65	White	7	4.2	No	95	3	0	0	Yes
<65	Black	6	4.3	No	54	2	0	0	Yes
<65	White	6	4.3	No	86	2	0	0	Yes
65-69	Others	7	4.4	No	24	2	0	0	Yes
<65	White	7	4.5	No	49	1	0	0	Yes
<65	White	7	4.6	No	95	2	0	0	Yes
65-69	White	6	4.7	No	96	2	0	0	Yes
65-69	White	8	4.8	No	62	2	0	0	Yes
70-74	Black	6	4.9	No	72	1	0	0	Yes
<65	White	7	5	No	90	1	0	0	Yes
<65	White	6	5.1	No	86	2	0	0	Yes
65-69	White	6	5.2	No	24	2	0	0	Yes
65-69	White	6	5.3	No	69	2	0	0	Yes
75-79	White	7	5.4	Yes	93	2	0	0	Yes
75-79	Black	9	5.4	No	21	3	0	0	Yes
65-69	White	6	5.5	No	64	3	0	0	Yes
<65	White	6	5.6	No	97	2	0	0	Yes
<65	Black	8	5.7	No	56	3	0	0	Yes
<65	White	6	5.8	No	84	1	0	0	Yes
65-69	White	6	5.9	No	73	1	0	0	Yes
65-69	White	6	6	No	86	1	0	0	Yes
65-69	White	6	6.1	No	40	2	0	0	Yes
65-69	Others	8	6.2	No	25	3	0	0	Yes
<65	White	7	6.3	No	99	2	0	0	Yes
65-69	Others	7	6.4	No	53	2	0	0	Yes
<65	White	6	6.5	No	20	2	0	0	Yes
70-74	White	6	6.7	No	87	1	0	0	Yes
<65	White	7	6.9	No	74	2	0	0	Yes
<65	White	7	7	No	88	2	0	0	Yes
<65	White	7	7.2	No	34	2	0	0	Yes
>85	White	7	7.4	No	37	1	0	0	Yes
<65	White	9	7.5	No	28	3	0	0	Yes
<65	White	7	7.7	No	32	2	0	0	Yes
<65	White	6	7.9	No	81	1	0	0	Yes
<65	White	6	8	No	67	2	0	0	Yes
65-69	White	6	8.2	No	82	2	0	0	Yes
65-69	White	7	8.4	Yes	58	1	0	0	Yes
<65	White	6	8.6	No	67	2	0	0	Yes
<65	White	7	8.9	No	40	2	0	0	Yes
<65	White	6	9.1	No	33	2	0	0	Yes
<65	White	6	9.4	Yes	12	1	0	0	Yes
65-69	Black	7	9.8	No	36	2	0	0	Yes
<65	White	6	0.5	No	13	1	0	0	Yes
<65	White	6	1.6	No	40	2	0	0	Yes
65-69	White	7	2.9	No	34	1	0	0	Yes
<65	White	6	3.9	No	92	2	0	0	Yes
65-69	Others	7	4.2	No	12	1	0	0	Yes
65-69	White	6	4.5	No	82	1	0	0	Yes
>85	Others	7	4.9	No	41	2	0	0	Yes
<65	White	6	5	No	55	2	0	0	Yes
<65	White	6	5.2	No	39	1	0	0	Yes
65-69	White	7	5.6	No	26	2	1	1	Yes
70-74	White	7	5.8	No	104	1	0	0	Yes
<65	White	7	6.4	No	32	1	0	0	Yes
70-74	White	6	6.7	Yes	91	1	0	0	Yes
70-74	White	6	7.1	No	12	2	0	0	Yes
70-74	White	6	7.3	No	34	1	0	0	Yes
<65	Others	6	8	No	65	1	0	0	Yes
75-79	White	7	8.9	No	98	1	0	0	Yes
<65	White	6	9.7	No	86	1	0	0	Yes
70-74	Others	8	4.1	No	70	3	0	0	No
<65	White	7	7	No	38	3	0	0	No
70-74	White	8	0.9	No	18	1	0	0	Yes
65-69	Black	7	1.6	No	47	2	0	0	Yes
70-74	White	10	2.2	Yes	13	2	1	1	Yes
65-69	White	10	2.8	No	39	4	0	0	Yes
65-69	White	7	3.1	No	91	2	0	0	Yes
<65	Others	7	3.4	No	99	3	0	0	Yes
<65	White	6	3.8	No	85	2	0	0	Yes
<65	White	6	4	No	83	2	0	0	Yes
<65	White	6	4.1	No	76	3	0	0	Yes
65-69	White	6	4.3	No	44	2	0	0	Yes
<65	White	7	4.4	No	70	3	0	0	Yes
<65	White	6	4.5	No	53	1	0	0	Yes
70-74	White	7	4.6	No	17	2	0	0	Yes
70-74	Black	6	4.6	No	87	1	0	0	Yes
<65	Black	6	4.7	No	25	1	0	0	Yes
<65	Others	7	4.8	No	64	2	0	0	Yes
<65	White	6	4.9	No	84	3	0	0	Yes
65-69	White	7	5	No	19	2	0	0	Yes
<65	White	6	5	No	85	2	0	0	Yes
70-74	White	7	5.1	Yes	61	1	0	0	Yes
<65	Black	6	5.2	No	31	2	0	0	Yes
70-74	White	7	5.3	No	76	2	0	0	Yes
<65	White	6	5.4	No	90	1	0	0	Yes
65-69	Black	7	5.6	No	30	2	0	0	Yes
70-74	White	7	5.7	No	99	2	0	0	Yes
65-69	White	7	5.8	No	44	1	0	0	Yes
65-69	White	7	5.9	No	72	1	0	0	Yes
70-74	White	8	6	No	46	1	0	0	Yes
<65	White	7	6.1	No	17	2	0	0	Yes
<65	White	6	6.2	No	106	2	0	0	Yes
<65	Others	7	6.4	No	78	3	0	0	Yes
70-74	Black	7	6.6	No	22	1	0	0	Yes
65-69	White	8	6.7	No	91	3	0	0	Yes
70-74	White	7	6.8	No	94	3	0	0	Yes
<65	White	6	6.9	No	97	1	0	0	Yes
75-79	White	7	7.2	No	90	1	0	0	Yes
70-74	White	7	7.3	No	46	2	0	0	Yes
75-79	White	6	7.4	No	49	1	0	0	Yes
<65	Black	7	7.6	No	35	3	0	0	Yes
<65	Black	7	7.8	No	107	3	0	0	Yes
<65	White	7	8	No	79	2	0	0	Yes
70-74	White	6	8.2	No	84	1	0	0	Yes
75-79	White	6	8.4	No	75	1	0	0	Yes
<65	White	6	8.8	No	65	2	0	0	Yes
<65	Black	6	9.2	No	60	1	0	0	Yes
<65	Others	7	9.4	No	93	2	0	0	Yes
<65	White	7	9.7	No	77	2	0	0	Yes
65-69	White	6	0.1	No	18	1	0	0	Yes
<65	White	6	2.5	No	65	1	0	0	Yes
<65	White	6	3.4	No	93	1	0	0	Yes
<65	White	6	3.8	No	72	1	0	0	Yes
75-79	White	6	4.1	No	24	1	0	0	Yes
70-74	Others	6	4.2	No	84	1	0	0	Yes
<65	Black	6	4.5	No	80	1	0	0	Yes
<65	Others	6	4.8	No	62	1	0	0	Yes
65-69	White	6	5.1	No	63	1	0	0	Yes
65-69	White	7	5.3	No	54	1	0	0	Yes
<65	White	6	5.5	No	91	1	0	0	Yes
<65	White	6	5.6	No	50	1	0	0	Yes
<65	White	7	6	No	63	2	0	0	Yes
65-69	White	7	6.3	No	26	1	0	0	Yes
<65	Black	7	6.5	No	12	1	0	0	Yes
<65	Others	7	7	No	86	1	0	0	Yes
<65	Black	6	7.3	No	74	1	0	0	Yes
65-69	White	6	7.9	No	100	1	0	0	Yes
75-79	Black	6	8.5	No	68	1	0	0	Yes
65-69	White	7	8.8	Yes	43	2	0	0	Yes
65-69	White	7	9.6	No	58	1	0	0	Yes
<65	Black	9	4.4	No	95	3	0	0	No
<65	White	7	5.4	Yes	28	2	0	0	No
<65	White	8	7.8	No	78	3	0	0	No
<65	White	6	0.9	No	60	2	0	0	Yes
70-74	White	7	1.8	No	45	2	0	0	Yes
65-69	Others	6	2.6	No	43	2	0	0	Yes
<65	White	6	3	No	85	2	0	0	Yes
<65	Black	6	3.3	Yes	83	1	0	0	Yes
<65	White	7	3.6	No	27	3	1	0	Yes
70-74	White	6	3.8	No	82	2	0	0	Yes
<65	White	6	4	No	59	2	0	0	Yes
<65	White	6	4.1	No	76	2	0	0	Yes
<65	White	7	4.2	No	93	3	0	0	Yes
70-74	White	6	4.2	No	17	1	0	0	Yes
<65	White	7	4.3	No	39	3	0	0	Yes
<65	White	6	4.4	No	69	2	0	0	Yes
<65	White	7	4.5	No	69	3	0	0	Yes
70-74	White	7	4.6	No	106	1	0	0	Yes
65-69	White	7	4.7	No	93	2	0	0	Yes
<65	White	7	4.8	No	104	2	0	0	Yes
65-69	White	6	4.9	No	75	1	0	0	Yes
65-69	White	6	5	No	28	2	0	0	Yes
<65	White	7	5.1	No	21	2	0	0	Yes
<65	White	7	5.2	No	101	2	0	0	Yes
<65	White	7	5.3	No	54	2	0	0	Yes
<65	White	7	5.4	No	47	3	0	0	Yes
70-74	White	6	5.5	No	14	1	0	0	Yes
<65	White	7	5.7	No	107	2	0	0	Yes
<65	Black	7	5.7	No	30	2	0	0	Yes
70-74	White	6	5.8	No	107	1	0	0	Yes
65-69	White	6	6	No	90	2	0	0	Yes
<65	White	7	6.1	No	91	3	0	0	Yes
<65	White	6	6.2	No	23	1	0	0	Yes
<65	White	6	6.3	No	21	1	0	0	Yes
65-69	White	7	6.4	No	30	2	0	0	Yes
<65	White	7	6.5	No	25	2	0	0	Yes
<65	Black	8	6.6	No	28	3	0	0	Yes
65-69	White	7	6.8	No	26	3	0	0	Yes
65-69	White	8	6.9	No	40	3	0	0	Yes
65-69	Black	6	7.1	No	99	2	0	0	Yes
70-74	White	7	7.3	No	92	2	0	0	Yes
<65	White	6	7.4	No	50	2	0	0	Yes
<65	White	6	7.8	No	77	2	0	0	Yes
70-74	Black	7	8	No	98	1	0	0	Yes
70-74	Black	7	8.2	No	84	2	0	0	Yes
65-69	White	7	8.4	No	65	2	0	0	Yes
70-74	White	7	8.7	No	19	3	0	0	Yes
<65	White	6	9	No	106	2	0	0	Yes
<65	White	7	9.4	No	36	1	0	0	Yes
<65	Black	6	9.8	No	91	2	0	0	Yes
75-79	White	6	1.3	No	61	1	0	0	Yes
65-69	White	6	2.5	No	22	2	0	0	Yes
<65	Black	6	3.3	No	23	1	0	0	Yes
70-74	Black	7	3.9	Yes	58	2	0	0	Yes
75-79	Black	6	4.5	No	92	1	0	0	Yes
70-74	White	7	4.7	No	88	1	0	0	Yes
<65	White	6	4.9	No	44	1	0	0	Yes
65-69	White	6	5.1	No	61	1	0	0	Yes
<65	White	6	5.4	No	86	1	0	0	Yes
70-74	White	9	5.5	Yes	71	1	0	0	Yes
65-69	White	6	5.9	No	46	1	0	0	Yes
<65	White	6	6.1	No	93	1	0	0	Yes
<65	White	7	6.8	No	30	2	0	0	Yes
65-69	Black	7	7	No	18	1	0	0	Yes
70-74	White	6	7.4	No	67	1	0	0	Yes
<65	White	7	7.7	No	27	1	0	0	Yes
70-74	White	6	8.1	No	32	1	0	0	Yes
65-69	White	6	8.8	No	45	1	0	0	Yes
70-74	White	8	9.1	No	27	1	0	0	Yes
65-69	Others	6	9.7	No	58	1	0	0	Yes
<65	White	7	3.9	No	44	3	0	0	No
65-69	White	7	6.7	No	86	3	0	0	No
75-79	White	6	0.8	No	53	2	0	0	Yes
<65	White	6	1.6	No	32	2	0	0	Yes
65-69	White	6	2.4	No	76	2	0	0	Yes
<65	White	6	3.1	No	80	2	0	0	Yes
<65	White	6	3.4	No	82	2	0	0	Yes
<65	White	7	3.7	No	45	2	0	0	Yes
<65	White	7	4	No	93	2	0	0	Yes
65-69	White	7	4.1	No	48	2	0	0	Yes
<65	White	7	4.2	No	89	2	0	0	Yes
<65	White	7	4.3	No	83	3	0	0	Yes
<65	Others	6	4.5	No	91	2	0	0	Yes
65-69	White	6	4.6	No	105	2	0	0	Yes
<65	Others	6	4.7	No	22	1	0	0	Yes
<65	White	8	4.8	No	107	2	0	0	Yes
<65	White	9	4.9	No	57	2	0	0	Yes
<65	Others	7	5	No	29	3	0	0	Yes
<65	White	7	5	No	16	2	0	0	Yes
<65	White	6	5.1	No	60	2	0	0	Yes
65-69	White	7	5.2	Yes	106	2	0	0	Yes
<65	White	7	5.3	No	91	3	0	0	Yes
65-69	Black	6	5.4	Yes	46	2	0	0	Yes
65-69	White	6	5.5	No	106	1	0	0	Yes
75-79	White	7	5.6	No	30	1	0	0	Yes
<65	White	7	5.7	No	63	2	0	0	Yes
70-74	White	7	5.8	Yes	37	1	0	0	Yes
<65	Black	7	5.9	No	74	1	0	0	Yes
70-74	White	8	6	No	85	1	0	0	Yes
<65	White	6	6.1	No	38	2	0	0	Yes
<65	White	7	6.3	No	65	2	0	0	Yes
65-69	White	6	6.4	No	70	1	0	0	Yes
<65	White	7	6.5	No	100	2	0	0	Yes
<65	White	6	6.6	No	23	2	0	0	Yes
<65	White	8	6.8	No	29	3	0	0	Yes
<65	White	9	6.9	No	47	3	1	0	Yes
<65	White	6	7	Yes	6	2	0	0	Yes
70-74	Black	7	7.2	No	24	2	0	0	Yes
<65	White	8	7.4	No	15	3	0	0	Yes
70-74	Black	7	7.6	Yes	44	1	0	0	Yes
65-69	White	6	7.8	No	5	2	0	0	Yes
<65	White	6	8	No	80	1	0	0	Yes
75-79	White	7	8.2	No	19	1	0	0	Yes
75-79	White	7	8.6	No	69	1	0	0	Yes
70-74	Black	8	9	No	37	2	0	0	Yes
65-69	White	7	9.4	No	32	2	0	0	Yes
70-74	White	8	9.9	No	15	2	0	0	Yes
<65	White	7	1.4	No	28	2	0	0	Yes
75-79	White	6	2.9	No	27	2	0	0	Yes
<65	White	6	3.2	No	94	1	0	0	Yes
<65	White	6	3.8	No	103	1	0	0	Yes
<65	Others	6	4.1	No	94	2	0	0	Yes
<65	White	6	4.3	No	40	1	0	0	Yes
65-69	White	6	4.4	No	104	1	0	0	Yes
75-79	White	6	4.6	No	94	2	0	0	Yes
<65	White	6	4.8	No	81	2	0	0	Yes
<65	White	6	5	No	23	1	0	0	Yes
<65	White	6	5.2	No	29	1	0	0	Yes
65-69	White	7	5.4	No	45	1	0	0	Yes
<65	Black	6	5.8	No	14	1	0	0	Yes
65-69	White	7	6.1	No	46	2	0	0	Yes
<65	White	8	6.4	No	73	1	0	0	Yes
<65	White	6	7.1	No	33	2	0	0	Yes
65-69	White	6	7.4	No	95	1	0	0	Yes
<65	White	6	7.7	No	74	1	0	0	Yes
70-74	White	8	8.1	No	16	2	0	0	Yes
65-69	White	6	8.5	Yes	52	1	0	0	Yes
65-69	White	6	8.8	No	45	2	0	0	Yes
65-69	White	6	9.1	No	46	1	0	0	Yes
70-74	White	6	9.6	No	103	1	0	0	Yes
65-69	White	8	4.2	No	70	2	0	0	No
65-69	White	9	6.1	No	48	3	1	0	No
<65	White	7	9.6	No	91	2	0	0	No
<65	White	6	1.7	No	84	2	0	0	Yes
<65	White	7	2.3	Yes	71	3	0	0	Yes
65-69	White	6	2.7	Yes	33	2	0	0	Yes
<65	White	9	3.3	No	11	3	0	0	Yes
75-79	White	7	3.6	No	13	2	0	0	Yes
<65	Black	6	3.8	No	85	2	0	0	Yes
<65	Black	6	4	Yes	57	1	0	0	Yes
65-69	White	7	4.2	No	76	1	0	0	Yes
65-69	White	7	4.3	No	32	1	0	0	Yes
<65	White	6	4.4	No	89	2	0	0	Yes
65-69	White	6	4.5	No	95	2	0	0	Yes
65-69	White	6	4.5	No	56	2	0	0	Yes
65-69	White	7	4.7	No	20	2	0	0	Yes
<65	White	7	4.8	No	63	2	0	0	Yes
<65	White	6	4.9	No	106	2	0	0	Yes
<65	White	7	5	No	18	1	0	0	Yes
<65	Black	8	5	No	17	1	0	0	Yes
<65	White	7	5.1	No	3	2	0	0	Yes
70-74	White	6	5.2	No	34	2	0	0	Yes
<65	White	6	5.3	No	66	2	0	0	Yes
<65	White	9	5.4	No	107	3	0	0	Yes
65-69	Black	6	5.4	No	80	1	0	0	Yes
<65	White	7	5.5	No	10	2	0	0	Yes
70-74	White	8	5.6	No	27	3	0	0	Yes
75-79	White	7	5.7	No	63	1	0	0	Yes
<65	White	9	5.8	No	16	2	0	0	Yes
<65	White	6	5.9	No	45	2	0	0	Yes
70-74	Others	9	6.1	No	15	1	0	0	Yes
<65	White	6	6.2	No	104	3	0	0	Yes
70-74	Black	7	6.3	No	67	1	0	0	Yes
65-69	Others	9	6.5	No	16	2	0	0	Yes
<65	Others	7	6.6	No	96	1	0	0	Yes
75-79	White	6	6.7	No	83	1	0	0	Yes
70-74	White	7	6.9	No	70	1	0	0	Yes
<65	White	7	7	No	73	2	0	0	Yes
<65	White	6	7.2	No	17	2	0	0	Yes
<65	White	6	7.3	No	70	1	0	0	Yes
65-69	White	7	7.5	No	88	3	0	0	Yes
75-79	White	7	7.7	No	27	4	0	1	Yes
<65	White	6	7.9	No	96	1	0	0	Yes
65-69	White	6	8	Yes	5	2	0	0	Yes
70-74	Others	6	8.2	No	89	1	0	0	Yes
<65	White	6	8.6	No	70	1	0	0	Yes
65-69	White	6	8.9	Yes	34	1	0	0	Yes
<65	White	6	9.2	No	100	1	0	0	Yes
70-74	White	7	9.7	No	54	1	0	0	Yes
70-74	White	7	10	No	38	2	0	0	Yes
70-74	White	6	1.2	No	34	2	0	0	Yes
65-69	White	6	2.5	No	41	1	0	0	Yes
<65	White	6	3.2	No	92	2	0	0	Yes
<65	Black	7	3.7	No	42	1	0	0	Yes
<65	Others	6	4.1	No	98	1	0	0	Yes
80-84	White	7	4.3	No	89	2	0	0	Yes
<65	Others	6	4.6	No	20	1	0	0	Yes
<65	Others	6	4.8	No	67	1	0	0	Yes
<65	White	6	4.9	No	44	1	0	0	Yes
<65	White	6	5.3	No	88	1	0	0	Yes
<65	Black	6	5.6	No	98	1	0	0	Yes
65-69	White	6	6	No	63	1	0	0	Yes
<65	White	6	6.2	No	15	1	0	0	Yes
<65	White	7	6.6	No	33	1	0	0	Yes
75-79	White	6	7	No	82	1	0	0	Yes
75-79	White	6	7.5	Yes	25	2	0	0	Yes
65-69	Black	6	8.1	No	26	1	0	0	Yes
70-74	White	7	8.6	No	24	1	0	0	Yes
<65	Others	6	9	No	107	1	0	0	Yes
70-74	Black	6	9.5	Yes	42	2	0	0	Yes
<65	White	6	3.3	No	64	2	0	0	No
<65	White	6	0.3	No	49	1	0	0	Yes
65-69	Black	8	1.4	No	19	1	0	0	Yes
65-69	White	7	2.3	No	65	2	0	0	Yes
65-69	White	7	2.8	No	26	3	0	0	Yes
65-69	White	7	3.1	Yes	15	3	1	0	Yes
<65	White	6	3.4	No	101	3	0	0	Yes
<65	White	6	3.6	No	25	2	0	0	Yes
65-69	White	7	3.9	No	77	2	0	0	Yes
70-74	White	7	4	No	47	1	0	0	Yes
<65	White	6	4.2	No	19	1	0	0	Yes
65-69	White	7	4.3	No	50	2	0	0	Yes
<65	Black	6	4.4	No	46	1	0	0	Yes
<65	White	6	4.4	No	35	1	0	0	Yes
<65	White	7	4.5	No	41	2	0	0	Yes
80-84	White	6	4.6	No	99	1	0	0	Yes
65-69	White	8	4.7	No	59	2	0	0	Yes
<65	White	6	4.8	No	83	2	0	0	Yes
<65	White	6	4.9	No	94	2	0	0	Yes
70-74	Others	7	5	No	15	2	0	0	Yes
<65	White	9	5	No	80	2	0	0	Yes
<65	White	8	5.1	No	59	2	0	0	Yes
75-79	White	7	5.2	Yes	18	2	0	0	Yes
<65	White	6	5.3	No	89	1	0	0	Yes
65-69	Others	10	5.4	No	96	3	0	0	Yes
<65	White	8	5.5	No	87	3	0	0	Yes
<65	White	7	5.6	No	83	2	0	0	Yes
70-74	Others	6	5.7	No	93	1	0	0	Yes
65-69	White	8	5.8	No	23	3	0	0	Yes
70-74	Black	7	5.9	No	70	2	0	0	Yes
<65	White	6	6	No	82	2	0	0	Yes
65-69	White	6	6.1	No	51	1	0	0	Yes
<65	White	7	6.2	Yes	62	2	0	0	Yes
70-74	White	7	6.3	No	102	1	0	0	Yes
<65	White	7	6.4	No	40	3	0	0	Yes
70-74	White	6	6.6	No	94	1	0	0	Yes
65-69	White	6	6.7	No	91	2	0	0	Yes
70-74	White	8	7	Yes	39	1	0	0	Yes
<65	White	7	7	No	22	3	0	0	Yes
<65	White	8	7.3	Yes	23	2	0	0	Yes
70-74	White	9	7.4	No	41	3	0	0	Yes
70-74	White	7	7.6	No	71	2	0	0	Yes
65-69	White	9	7.9	No	99	3	0	0	Yes
70-74	Black	7	8	Yes	46	1	0	0	Yes
75-79	White	7	8.2	No	92	2	0	0	Yes
<65	White	8	8.5	Yes	55	2	0	0	Yes
70-74	White	7	8.7	No	40	2	0	0	Yes
<65	White	8	9	No	41	3	0	0	Yes
65-69	Black	7	9.3	No	85	1	0	0	Yes
65-69	White	8	9.7	No	56	3	0	0	Yes
<65	White	8	10	No	12	2	0	0	Yes
70-74	White	6	1.2	No	36	1	0	0	Yes
70-74	White	6	2.6	No	33	1	0	0	Yes
<65	Black	6	3.7	No	47	1	0	0	Yes
65-69	White	7	4.1	No	18	2	0	0	Yes
65-69	White	6	4.3	No	23	1	0	0	Yes
<65	White	6	4.7	No	46	1	0	0	Yes
70-74	White	6	4.9	No	52	1	0	0	Yes
70-74	White	6	5.1	Yes	47	2	0	0	Yes
<65	White	6	5.3	No	27	1	0	0	Yes
65-69	Others	6	5.6	No	24	1	0	0	Yes
<65	White	7	5.8	No	13	1	0	0	Yes
<65	Others	8	6.2	No	20	1	0	0	Yes
80-84	White	6	6.6	Yes	84	1	0	0	Yes
<65	White	6	6.9	No	70	1	0	0	Yes
70-74	White	6	7.2	No	68	1	0	0	Yes
70-74	Others	6	7.5	No	93	1	0	0	Yes
<65	Others	6	8	No	96	1	0	0	Yes
75-79	White	6	8.7	No	36	1	0	0	Yes
<65	Black	6	9.3	No	6	1	0	0	Yes
<65	White	9	3.2	Yes	81	3	1	0	No
<65	White	7	9.7	No	52	3	1	0	No
65-69	White	6	1.4	No	7	1	0	0	Yes
<65	White	6	2.2	No	94	2	0	0	Yes
<65	White	7	2.8	No	55	2	0	0	Yes
<65	White	6	3.1	No	18	2	0	0	Yes
65-69	White	7	3.6	No	91	1	0	0	Yes
<65	White	7	3.7	No	56	2	0	0	Yes
<65	White	6	4	No	4	2	0	0	Yes
65-69	White	6	4.1	No	77	2	0	0	Yes
<65	White	7	4.2	No	38	2	0	0	Yes
65-69	White	8	4.3	No	103	2	0	0	Yes
<65	White	7	4.4	No	6	1	0	0	Yes
<65	Black	7	4.5	No	72	2	0	0	Yes
70-74	White	7	4.5	No	54	3	0	0	Yes
65-69	Black	7	4.7	No	38	2	0	0	Yes
<65	White	6	4.8	No	58	2	0	0	Yes
<65	White	9	4.8	No	25	2	0	0	Yes
<65	White	6	5	No	68	2	0	0	Yes
65-69	White	6	5	No	17	1	0	0	Yes
<65	Others	7	5.2	No	65	1	0	0	Yes
<65	White	7	5.2	No	104	2	0	0	Yes
65-69	White	6	5.4	No	46	1	0	0	Yes
65-69	White	7	5.4	No	82	2	0	0	Yes
<65	White	7	5.5	No	59	1	0	0	Yes
65-69	White	6	5.6	No	84	2	0	0	Yes
65-69	White	7	5.7	No	61	1	0	0	Yes
<65	White	7	5.8	No	79	2	0	0	Yes
<65	Others	6	5.9	No	44	1	0	0	Yes
<65	White	6	6	No	43	2	0	0	Yes
65-69	White	6	6.2	No	20	1	0	0	Yes
75-79	White	7	6.3	No	100	1	0	0	Yes
65-69	White	9	6.4	No	69	3	0	0	Yes
<65	White	7	6.5	No	80	2	0	0	Yes
65-69	White	7	6.7	No	80	2	0	0	Yes
65-69	White	8	6.8	No	32	2	0	0	Yes
<65	White	7	7	No	35	2	0	0	Yes
<65	Others	7	7.2	No	18	1	0	1	Yes
65-69	White	7	7.3	No	41	3	0	0	Yes
75-79	White	6	7.5	No	107	1	0	0	Yes
65-69	White	7	7.7	No	80	2	0	0	Yes
65-69	White	7	7.9	No	30	2	0	0	Yes
<65	White	8	8.1	No	78	2	0	0	Yes
<65	Black	7	8.3	No	54	2	0	0	Yes
<65	White	8	8.5	No	84	1	0	0	Yes
75-79	White	7	8.7	No	66	1	0	0	Yes
65-69	White	7	8.9	No	44	1	0	0	Yes
65-69	Others	7	9.2	No	49	2	0	0	Yes
<65	White	6	9.4	No	46	2	0	0	Yes
<65	White	7	10	No	30	2	0	0	Yes
<65	White	6	1.1	No	48	2	0	0	Yes
<65	White	6	2.7	No	101	1	0	0	Yes
65-69	White	6	3.4	No	75	2	0	0	Yes
70-74	White	6	3.9	Yes	59	1	0	0	Yes
<65	White	6	4.3	No	53	1	0	0	Yes
70-74	White	6	4.6	No	99	1	0	0	Yes
70-74	White	6	4.7	Yes	23	2	0	0	Yes
<65	Black	6	4.9	No	32	1	0	0	Yes
<65	Black	6	5.1	No	77	1	0	0	Yes
70-74	White	6	5.3	No	63	2	0	0	Yes
65-69	White	6	5.6	No	25	1	0	0	Yes
65-69	White	6	6	No	41	1	0	0	Yes
75-79	White	6	6.1	No	89	1	0	0	Yes
75-79	Black	6	6.6	No	105	1	0	0	Yes
75-79	White	6	7	No	19	1	0	0	Yes
<65	White	6	7.1	No	82	1	0	0	Yes
<65	White	6	7.5	No	25	1	0	0	Yes
75-79	White	9	8.2	No	13	1	0	0	Yes
<65	White	9	9	No	65	1	0	1	Yes
<65	White	9	9.7	Yes	29	1	1	0	Yes
70-74	White	7	4.7	No	73	3	1	0	No
<65	White	7	8.9	No	68	3	0	0	No
<65	White	7	1.2	No	18	2	0	0	Yes
75-79	Others	7	1.9	No	84	2	0	0	Yes
<65	White	6	2.4	No	84	2	0	0	Yes
75-79	White	9	2.9	No	103	2	0	0	Yes
65-69	White	7	3.3	No	14	2	0	0	Yes
<65	Black	6	3.5	No	92	2	0	0	Yes
65-69	White	6	3.8	No	78	2	0	0	Yes
<65	White	6	3.9	No	40	2	0	0	Yes
70-74	White	6	4.1	No	29	3	0	0	Yes
<65	White	7	4.2	No	99	1	0	0	Yes
<65	White	6	4.3	No	48	2	0	0	Yes
<65	White	6	4.3	No	80	1	0	0	Yes
65-69	White	7	4.4	No	20	1	0	0	Yes
<65	White	6	4.5	No	41	2	0	0	Yes
65-69	Black	8	4.6	No	94	1	0	0	Yes
<65	Black	6	4.8	Yes	24	1	0	0	Yes
<65	White	8	4.9	No	23	2	0	0	Yes
75-79	White	7	5	No	18	2	0	0	Yes
<65	Black	6	5	Yes	3	3	0	0	Yes
70-74	White	7	5.1	No	68	1	0	0	Yes
<65	White	6	5.2	No	52	2	0	0	Yes
65-69	Black	7	5.3	No	27	2	0	0	Yes
75-79	White	7	5.4	No	100	1	0	0	Yes
70-74	White	8	5.5	No	34	2	0	0	Yes
<65	Others	7	5.6	No	91	1	0	0	Yes
65-69	White	6	5.7	No	70	3	0	0	Yes
<65	White	6	5.8	No	25	2	0	0	Yes
<65	White	6	5.9	No	39	2	0	0	Yes
<65	White	7	6	No	41	2	0	0	Yes
<65	White	8	6.1	No	97	2	0	0	Yes
<65	White	6	6.2	Yes	103	1	0	0	Yes
<65	White	6	6.3	No	50	2	0	0	Yes
65-69	White	7	6.5	No	35	1	0	0	Yes
<65	White	7	6.6	No	99	3	0	0	Yes
<65	White	7	6.7	No	86	1	0	0	Yes
<65	White	7	6.9	No	48	2	0	0	Yes
<65	Black	6	7	No	80	1	0	0	Yes
<65	Black	7	7.2	No	27	2	0	0	Yes
<65	White	7	7.4	No	10	2	0	0	Yes
65-69	White	6	7.5	No	100	1	0	0	Yes
70-74	White	6	7.6	No	22	1	0	0	Yes
65-69	White	6	7.8	No	34	2	0	0	Yes
<65	White	7	8	No	90	2	0	0	Yes
<65	White	6	8.1	No	32	2	0	0	Yes
65-69	White	9	8.3	No	16	1	0	0	Yes
65-69	White	6	8.5	No	59	1	0	0	Yes
70-74	White	7	8.8	No	43	2	0	0	Yes
65-69	White	7	9	No	40	2	0	0	Yes
<65	White	7	9.4	No	106	2	0	0	Yes
<65	Black	6	9.6	No	42	1	0	0	Yes
70-74	White	7	9.9	No	3	2	1	0	Yes
<65	White	6	0.9	No	87	1	0	0	Yes
70-74	White	7	2.7	Yes	70	2	0	0	Yes
<65	White	6	3.6	No	25	1	0	0	Yes
<65	White	7	4.1	No	52	2	0	0	Yes
<65	Black	6	4.4	No	85	1	0	0	Yes
65-69	White	6	4.6	No	99	1	0	0	Yes
<65	White	6	4.8	No	105	2	0	0	Yes
65-69	White	6	4.9	No	13	1	0	0	Yes
<65	White	6	5.1	No	87	1	0	0	Yes
<65	White	6	5.5	No	62	1	0	0	Yes
65-69	White	6	5.8	No	79	1	0	0	Yes
65-69	White	7	6.2	No	20	1	0	0	Yes
75-79	White	6	6.5	No	23	1	0	0	Yes
65-69	Black	6	6.9	No	41	1	0	0	Yes
70-74	Others	6	7.2	No	22	1	0	0	Yes
65-69	White	7	8.2	No	56	2	0	0	Yes
70-74	White	6	9.1	No	47	1	0	0	Yes
70-74	White	7	5.1	No	44	3	0	0	No
65-69	White	7	0.9	No	73	2	0	0	Yes
<65	White	6	1.8	No	39	2	0	0	Yes
<65	Black	7	2.4	No	80	2	0	0	Yes
<65	Others	6	3	No	39	3	0	0	Yes
<65	White	7	3.4	No	82	2	0	0	Yes
<65	White	7	3.6	No	88	2	0	0	Yes
<65	White	6	3.8	No	76	2	0	0	Yes
65-69	White	6	3.9	No	52	2	1	0	Yes
<65	White	6	4.1	No	66	1	0	0	Yes
65-69	Black	6	4.2	No	100	2	0	0	Yes
65-69	Black	7	4.3	No	55	1	0	0	Yes
<65	White	7	4.5	No	95	2	0	0	Yes
<65	White	7	4.5	No	42	2	0	0	Yes
<65	Black	7	4.6	No	104	2	0	0	Yes
65-69	White	7	4.7	No	73	2	0	0	Yes
<65	White	6	4.8	No	96	1	0	0	Yes
<65	White	7	4.9	No	92	3	0	0	Yes
80-84	White	6	5	Yes	73	1	0	0	Yes
70-74	White	7	5	No	22	2	0	0	Yes
65-69	White	8	5.1	No	59	1	0	0	Yes
70-74	White	6	5.2	No	103	1	0	0	Yes
<65	Black	6	5.3	No	86	1	0	0	Yes
<65	White	7	5.4	No	14	2	0	0	Yes
<65	White	6	5.5	No	74	2	0	0	Yes
65-69	White	6	5.6	No	33	2	0	0	Yes
70-74	White	7	5.7	No	27	1	0	0	Yes
<65	White	9	5.8	Yes	72	3	0	0	Yes
<65	White	6	5.9	No	31	1	0	0	Yes
65-69	White	6	6	No	47	1	0	0	Yes
65-69	White	6	6.1	No	78	2	0	0	Yes
<65	Black	7	6.2	Yes	97	1	0	0	Yes
70-74	Others	7	6.4	No	41	2	0	0	Yes
65-69	White	7	6.5	No	84	2	0	0	Yes
<65	White	7	6.7	No	81	3	0	0	Yes
<65	White	7	6.9	Yes	23	2	0	0	Yes
65-69	White	7	7	No	73	1	0	0	Yes
<65	White	7	7.2	No	104	2	0	0	Yes
<65	White	8	7.3	No	41	3	0	1	Yes
70-74	White	6	7.5	No	100	3	0	0	Yes
65-69	White	7	7.7	No	26	1	0	0	Yes
<65	White	7	8	Yes	40	1	0	0	Yes
70-74	White	6	8.2	No	83	2	0	0	Yes
65-69	White	7	8.4	No	43	3	0	0	Yes
<65	White	6	8.7	No	28	2	0	0	Yes
<65	White	6	9	No	47	1	0	0	Yes
<65	White	6	9.3	No	54	1	0	0	Yes
70-74	White	8	9.5	No	44	2	0	0	Yes
65-69	White	7	9.8	No	29	1	0	0	Yes
70-74	Black	6	0.6	No	88	2	0	0	Yes
65-69	White	6	2	Yes	53	2	0	0	Yes
70-74	White	6	3	No	22	2	0	0	Yes
<65	Black	6	3.7	No	56	1	0	0	Yes
65-69	White	7	4.1	Yes	33	1	0	0	Yes
<65	White	6	4.3	No	15	2	0	0	Yes
<65	Black	6	4.5	No	74	1	0	0	Yes
75-79	White	6	4.8	No	64	1	0	0	Yes
65-69	Others	6	5	No	21	1	0	0	Yes
<65	White	7	5.2	No	19	1	0	0	Yes
70-74	White	6	5.5	No	26	1	0	0	Yes
<65	White	6	5.7	No	83	1	0	0	Yes
<65	White	6	6.2	No	63	1	0	0	Yes
75-79	White	6	6.4	No	68	1	0	0	Yes
<65	White	9	6.7	Yes	87	2	0	0	Yes
70-74	Black	8	7	No	24	1	0	0	Yes
<65	White	6	7.6	No	17	1	0	0	Yes
70-74	White	7	7.9	No	29	2	0	0	Yes
65-69	Others	7	8.3	No	78	2	0	0	Yes
65-69	White	6	8.6	No	54	1	0	0	Yes
75-79	White	6	9.6	Yes	79	1	0	0	Yes
<65	White	7	2.9	No	92	1	0	0	No
<65	White	7	6.6	No	100	2	0	0	No
<65	White	6	0.5	No	12	2	0	0	Yes
70-74	White	7	1.4	No	12	2	0	0	Yes
65-69	White	7	2.1	No	65	1	0	0	Yes
75-79	White	9	3	No	14	1	0	0	Yes
<65	White	6	3.4	No	82	2	0	0	Yes
70-74	White	7	3.6	No	27	2	0	0	Yes
<65	White	6	4	No	67	3	0	0	Yes
<65	White	6	4.1	No	42	3	0	0	Yes
65-69	White	7	4.2	No	93	2	0	0	Yes
70-74	White	7	4.3	No	15	2	0	0	Yes
<65	White	6	4.5	No	87	3	0	0	Yes
70-74	White	6	4.5	No	84	1	0	0	Yes
70-74	Black	6	4.6	No	91	2	0	0	Yes
65-69	White	8	4.7	No	103	2	1	0	Yes
65-69	White	6	4.8	No	88	1	0	0	Yes
<65	White	7	4.9	No	69	2	0	0	Yes
<65	White	7	5	Yes	82	1	0	0	Yes
<65	White	7	5.1	No	27	3	0	0	Yes
<65	White	6	5.1	No	64	2	0	0	Yes
70-74	White	7	5.2	No	49	3	0	0	Yes
<65	White	6	5.3	No	81	2	0	0	Yes
<65	White	6	5.4	No	75	2	0	0	Yes
65-69	White	9	5.6	No	30	2	0	0	Yes
65-69	White	7	5.6	No	35	1	0	0	Yes
65-69	Black	7	5.8	No	37	1	0	0	Yes
<65	Black	6	5.9	No	84	2	0	0	Yes
65-69	White	6	6	No	41	2	0	0	Yes
<65	White	6	6.1	No	13	1	0	0	Yes
65-69	White	7	6.2	No	22	2	0	0	Yes
70-74	White	7	6.3	No	46	1	0	0	Yes
<65	White	7	6.5	No	32	2	0	0	Yes
75-79	White	7	6.6	No	10	3	0	0	Yes
70-74	White	7	6.8	No	24	1	0	0	Yes
70-74	White	6	6.9	No	68	2	0	0	Yes
70-74	White	7	7	No	92	1	0	0	Yes
70-74	White	7	7.2	No	18	2	0	0	Yes
70-74	White	8	7.5	Yes	62	3	0	0	Yes
<65	White	7	7.7	No	22	3	1	0	Yes
<65	Black	9	7.9	No	37	4	1	1	Yes
<65	White	6	8.1	No	17	2	0	0	Yes
80-84	Others	6	8.3	Yes	81	1	0	0	Yes
65-69	White	7	8.5	Yes	56	1	0	0	Yes
65-69	White	6	8.9	No	68	1	0	0	Yes
65-69	Black	6	9.1	No	25	1	0	0	Yes
75-79	Others	9	9.4	No	22	1	0	0	Yes
<65	White	7	9.6	No	87	3	0	0	Yes
<65	White	7	10	No	73	3	0	0	Yes
<65	White	6	1.5	No	47	2	0	0	Yes
<65	Black	6	2.7	Yes	3	1	0	0	Yes
<65	White	6	3.3	No	56	1	0	0	Yes
65-69	Others	6	3.8	No	85	1	0	0	Yes
<65	Others	6	4.1	No	88	1	0	0	Yes
<65	White	6	4.3	No	39	2	0	0	Yes
70-74	Black	7	4.4	No	69	2	0	0	Yes
65-69	Others	6	4.7	No	45	1	0	0	Yes
65-69	Black	6	4.9	No	65	1	0	0	Yes
65-69	Black	7	5.1	Yes	10	1	0	0	Yes
70-74	White	6	5.4	No	14	1	0	0	Yes
<65	White	7	5.7	No	72	1	0	0	Yes
70-74	White	6	5.8	No	62	1	0	0	Yes
65-69	White	7	6.3	No	57	2	0	0	Yes
75-79	White	6	6.6	No	93	1	0	0	Yes
<65	Black	6	7	No	34	1	0	0	Yes
75-79	White	7	7.3	No	94	1	0	0	Yes
<65	White	6	7.5	No	48	1	0	0	Yes
<65	White	6	7.9	Yes	82	2	0	0	Yes
65-69	Others	6	8.7	No	68	2	0	0	Yes
65-69	White	7	9.2	No	54	1	0	0	Yes
<65	Black	6	3.7	No	49	2	0	0	No
65-69	White	8	8	No	60	3	0	0	No
<65	White	9	9.9	No	11	3	0	0	No
70-74	Others	8	1.2	No	39	2	0	0	Yes
75-79	White	8	2	No	68	2	0	0	Yes
<65	White	7	2.7	Yes	56	2	0	0	Yes
<65	White	6	3.1	No	14	2	0	0	Yes
<65	White	6	3.4	No	81	2	0	0	Yes
<65	Black	6	3.6	Yes	68	1	0	0	Yes
<65	White	6	3.8	No	69	2	0	0	Yes
<65	White	6	4	No	78	2	0	0	Yes
65-69	White	6	4.1	No	36	1	0	0	Yes
<65	White	7	4.2	No	78	2	0	0	Yes
<65	White	6	4.3	No	63	2	0	0	Yes
<65	White	7	4.5	No	92	2	0	0	Yes
65-69	White	7	4.6	No	90	2	0	0	Yes
80-84	White	7	4.7	Yes	30	2	0	0	Yes
65-69	White	6	4.8	No	95	1	0	0	Yes
70-74	White	6	4.9	No	97	1	0	0	Yes
70-74	White	7	4.9	No	26	2	0	0	Yes
75-79	White	7	5	No	31	2	0	0	Yes
65-69	Others	7	5.1	No	68	2	0	0	Yes
75-79	White	6	5.2	No	100	2	0	0	Yes
75-79	White	7	5.3	No	53	1	0	0	Yes
<65	White	7	5.4	No	96	3	0	0	Yes
65-69	White	7	5.5	No	81	2	0	0	Yes
<65	Black	7	5.6	No	96	2	0	0	Yes
<65	White	7	5.7	No	100	2	0	0	Yes
65-69	White	7	5.8	No	24	1	0	0	Yes
65-69	White	6	5.9	No	85	1	0	0	Yes
65-69	White	7	6	No	45	3	0	0	Yes
<65	White	6	6.1	No	106	1	0	0	Yes
<65	White	7	6.2	No	106	2	0	0	Yes
<65	Black	7	6.3	No	51	2	0	0	Yes
65-69	White	6	6.5	No	40	1	0	0	Yes
<65	Black	6	6.6	No	12	2	0	0	Yes
<65	White	7	6.8	No	16	2	0	0	Yes
<65	White	7	7	No	37	3	0	0	Yes
70-74	White	7	7.1	No	75	3	0	0	Yes
65-69	White	7	7.2	No	81	3	0	0	Yes
70-74	White	8	7.5	No	14	3	0	0	Yes
<65	Others	6	7.7	No	21	1	0	0	Yes
<65	White	8	7.8	No	17	3	0	0	Yes
<65	Black	6	8	No	60	2	0	0	Yes
65-69	White	7	8.3	No	95	1	0	0	Yes
65-69	Others	7	8.5	No	83	2	0	0	Yes
65-69	Others	6	8.7	No	42	2	0	0	Yes
70-74	White	9	9	No	94	1	0	0	Yes
75-79	White	7	9.3	No	73	1	0	0	Yes
65-69	White	7	9.5	Yes	9	1	0	0	Yes
75-79	White	6	10	Yes	43	2	0	0	Yes
<65	White	6	1.3	No	42	1	0	0	Yes
<65	White	6	2.5	No	42	1	0	0	Yes
<65	White	6	3.5	No	21	2	0	0	Yes
65-69	White	7	4.1	No	30	1	0	0	Yes
<65	Black	8	4.3	No	21	1	0	0	Yes
<65	White	6	4.5	No	62	2	0	0	Yes
65-69	Black	6	4.6	No	76	1	0	0	Yes
65-69	White	7	5	No	57	1	0	0	Yes
<65	White	6	5.2	No	4	1	0	0	Yes
65-69	White	6	5.4	Yes	37	1	0	0	Yes
80-84	Black	8	5.6	Yes	47	1	0	0	Yes
65-69	White	6	6	No	70	1	0	0	Yes
70-74	White	6	6.4	Yes	74	1	0	0	Yes
<65	White	7	6.6	No	97	2	0	0	Yes
65-69	White	6	6.9	No	71	2	0	0	Yes
75-79	White	6	7.3	No	17	1	0	0	Yes
65-69	White	6	7.5	No	33	1	0	0	Yes
<65	White	7	8.2	Yes	17	1	0	0	Yes
65-69	White	7	8.8	Yes	26	2	0	0	Yes
<65	White	6	5.3	No	90	2	0	0	No
65-69	White	6	0.6	No	68	2	0	0	Yes
65-69	White	7	1.5	No	38	2	0	0	Yes
70-74	White	7	2.4	No	71	1	0	0	Yes
65-69	White	8	3.1	No	62	2	0	0	Yes
<65	White	7	3.4	No	78	2	0	0	Yes
<65	White	7	3.8	No	69	3	0	0	Yes
<65	White	6	4	No	95	2	0	0	Yes
70-74	Black	7	4.1	No	29	2	0	0	Yes
<65	White	7	4.3	No	50	2	0	0	Yes
65-69	White	7	4.4	No	12	2	0	0	Yes
<65	White	7	4.5	No	89	2	0	0	Yes
<65	Black	7	4.6	No	100	1	0	0	Yes
70-74	White	7	4.6	No	93	2	0	0	Yes
<65	White	7	4.7	No	42	2	0	0	Yes
65-69	White	6	4.8	No	59	2	0	0	Yes
<65	Others	7	4.9	No	59	2	0	0	Yes
70-74	White	10	5	Yes	13	4	0	0	Yes
65-69	White	6	5	No	21	2	0	0	Yes
<65	White	6	5.2	No	19	2	0	0	Yes
70-74	White	7	5.3	No	51	3	0	0	Yes
<65	White	6	5.4	No	41	2	0	0	Yes
65-69	White	8	5.5	No	79	2	0	0	Yes
<65	White	6	5.6	No	25	1	0	0	Yes
70-74	White	6	5.7	No	63	1	0	0	Yes
<65	White	6	5.8	Yes	40	1	0	0	Yes
65-69	White	7	6	No	60	2	0	0	Yes
<65	White	6	6.1	No	69	2	0	0	Yes
65-69	White	6	6.2	No	47	1	0	0	Yes
65-69	Black	7	6.3	No	62	3	0	0	Yes
65-69	Others	6	6.4	No	43	2	0	0	Yes
65-69	White	7	6.6	No	16	2	0	0	Yes
65-69	White	7	6.7	No	85	2	0	0	Yes
<65	Black	7	6.8	No	27	2	1	0	Yes
<65	Others	7	7	No	76	2	0	0	Yes
<65	White	7	7.1	No	20	2	0	0	Yes
70-74	White	6	7.3	No	38	2	0	0	Yes
70-74	White	7	7.5	No	18	1	0	0	Yes
75-79	White	8	7.6	No	20	1	0	0	Yes
65-69	White	7	7.8	No	70	1	0	0	Yes
70-74	White	7	8	No	96	1	0	0	Yes
<65	Black	7	8.1	No	23	2	0	0	Yes
75-79	Others	7	8.4	No	32	1	0	0	Yes
<65	White	7	8.7	No	8	2	0	0	Yes
70-74	White	7	8.9	No	81	2	0	0	Yes
65-69	Black	7	9.1	No	26	2	0	0	Yes
70-74	Others	7	9.4	No	14	2	0	0	Yes
<65	White	7	9.8	No	19	2	0	0	Yes
<65	White	8	10	No	29	3	0	0	Yes
65-69	White	7	1.8	No	33	2	0	0	Yes
75-79	White	6	2.7	Yes	62	2	0	0	Yes
75-79	White	10	3.3	Yes	16	4	0	1	Yes
65-69	White	6	3.7	No	43	1	0	0	Yes
<65	Black	6	4.1	No	90	1	0	0	Yes
<65	White	6	4.2	No	106	1	0	0	Yes
<65	White	6	4.4	No	51	1	0	0	Yes
65-69	Black	7	4.6	No	78	1	0	0	Yes
65-69	Black	6	4.9	No	37	1	0	0	Yes
65-69	White	9	5.1	No	58	1	0	0	Yes
65-69	White	7	5.3	No	93	2	0	0	Yes
<65	White	6	5.5	No	77	1	0	0	Yes
75-79	White	7	5.7	No	69	1	0	0	Yes
70-74	White	6	5.9	No	28	1	0	0	Yes
<65	Black	7	6.1	No	82	1	0	0	Yes
80-84	White	6	6.5	No	35	1	0	0	Yes
65-69	White	7	6.9	No	1	2	0	0	Yes
75-79	White	6	7.3	No	22	1	0	0	Yes
>85	White	6	8	No	105	1	0	0	Yes
70-74	White	9	8.5	Yes	29	1	0	0	Yes
80-84	White	7	9.4	Yes	25	1	0	0	Yes
65-69	White	9	4.5	No	38	3	0	0	No
<65	White	6	0.1	Yes	21	2	0	0	Yes
65-69	White	8	1.4	Yes	50	2	0	0	Yes
<65	White	6	2.1	No	98	2	0	0	Yes
<65	White	6	2.6	No	25	2	0	0	Yes
<65	White	6	3.2	No	94	2	0	0	Yes
80-84	White	10	3.5	No	105	1	0	0	Yes
<65	White	6	3.8	No	81	3	0	0	Yes
65-69	Black	7	4	No	44	2	0	0	Yes
<65	White	7	4.1	No	36	3	0	0	Yes
<65	White	7	4.2	No	91	2	0	0	Yes
<65	White	7	4.3	No	44	2	0	0	Yes
<65	White	6	4.4	No	97	1	0	0	Yes
<65	White	6	4.5	No	97	2	0	0	Yes
70-74	White	7	4.5	No	14	1	0	0	Yes
<65	White	6	4.6	No	92	2	0	0	Yes
<65	White	7	4.7	No	91	1	0	0	Yes
65-69	White	7	4.8	No	39	3	0	0	Yes
<65	White	6	4.9	No	72	3	0	0	Yes
70-74	White	7	5	Yes	15	2	0	0	Yes
<65	White	6	5	No	18	1	0	0	Yes
<65	White	6	5.1	No	59	2	0	0	Yes
65-69	White	9	5.2	No	46	3	0	0	Yes
<65	White	6	5.3	No	21	1	0	0	Yes
<65	White	8	5.4	No	71	3	0	0	Yes
65-69	White	7	5.5	No	77	3	0	0	Yes
65-69	White	6	5.6	No	30	2	0	0	Yes
65-69	Black	9	5.7	No	73	3	0	0	Yes
<65	White	6	5.8	No	87	2	0	0	Yes
65-69	Black	7	6	No	30	1	0	0	Yes
<65	White	6	6.1	No	31	2	0	0	Yes
65-69	White	7	6.2	Yes	32	2	0	0	Yes
<65	White	7	6.3	No	100	2	0	0	Yes
65-69	Others	7	6.5	Yes	69	2	0	0	Yes
70-74	White	7	6.6	No	91	2	0	0	Yes
70-74	White	7	6.8	No	19	2	0	0	Yes
65-69	White	6	7	No	89	2	0	0	Yes
<65	Black	6	7.1	No	23	1	0	0	Yes
80-84	Others	9	7.2	No	68	1	0	0	Yes
65-69	Black	7	7.4	No	29	3	0	0	Yes
75-79	White	6	7.5	No	100	1	0	0	Yes
75-79	White	7	7.8	No	68	2	0	0	Yes
65-69	Others	6	8	No	100	2	0	0	Yes
70-74	White	8	8.2	No	55	3	0	0	Yes
65-69	Others	8	8.4	No	31	2	0	0	Yes
65-69	White	8	8.8	No	38	3	0	0	Yes
80-84	White	7	9	Yes	13	2	0	0	Yes
75-79	White	6	9.3	No	87	1	0	0	Yes
<65	White	7	9.7	Yes	13	1	0	0	Yes
>85	White	6	0.5	No	105	1	0	0	Yes
65-69	Black	6	2.4	No	73	2	0	0	Yes
65-69	White	6	3	No	41	1	0	0	Yes
70-74	White	6	3.5	No	29	1	0	0	Yes
<65	White	6	4.2	No	75	1	0	0	Yes
75-79	White	6	4.4	No	22	1	0	0	Yes
<65	White	8	4.6	No	73	2	0	0	Yes
<65	White	6	4.9	No	69	1	0	0	Yes
75-79	White	7	5.2	No	17	1	0	0	Yes
65-69	White	7	5.4	No	12	1	0	0	Yes
<65	Black	6	5.8	No	24	1	0	0	Yes
65-69	Others	6	6	No	60	1	0	0	Yes
65-69	Others	6	6.2	No	21	1	0	0	Yes
<65	White	6	6.6	No	98	1	0	0	Yes
65-69	White	6	6.8	Yes	43	1	0	0	Yes
65-69	White	6	7.1	No	99	1	0	0	Yes
<65	White	6	7.7	No	84	1	0	0	Yes
65-69	White	6	8	No	90	1	0	0	Yes
80-84	White	9	8.6	No	22	1	0	0	Yes
<65	White	6	9.2	No	28	2	0	0	Yes
70-74	White	7	9.5	No	36	1	0	0	Yes
<65	White	7	6.7	No	75	2	0	0	No
<65	White	6	0.4	No	70	2	0	0	Yes
<65	White	6	1.6	No	41	2	0	0	Yes
80-84	White	7	2.4	Yes	6	1	0	0	Yes
65-69	White	7	3	Yes	5	2	0	0	Yes
80-84	Others	6	3.3	No	55	2	0	0	Yes
70-74	White	7	3.5	No	105	1	0	0	Yes
<65	White	7	3.7	No	47	2	0	0	Yes
<65	Others	7	4	No	94	2	0	0	Yes
<65	Others	7	4.2	No	73	2	0	0	Yes
<65	White	6	4.2	No	78	2	0	0	Yes
<65	White	6	4.3	No	40	2	0	0	Yes
65-69	White	6	4.4	No	59	1	0	0	Yes
65-69	White	6	4.5	No	92	2	0	0	Yes
70-74	White	6	4.6	No	78	1	0	0	Yes
<65	Black	6	4.7	No	45	2	0	0	Yes
65-69	White	7	4.8	No	78	1	0	0	Yes
70-74	White	6	4.9	No	107	1	0	0	Yes
65-69	Black	8	4.9	No	34	2	0	0	Yes
65-69	White	6	5	No	87	1	0	0	Yes
<65	Black	6	5.1	No	66	2	0	0	Yes
70-74	Others	8	5.2	No	19	2	0	0	Yes
<65	White	6	5.3	No	65	1	0	0	Yes
70-74	White	8	5.4	No	99	2	0	0	Yes
70-74	White	6	5.4	No	86	2	0	0	Yes
<65	White	7	5.5	No	106	2	0	0	Yes
<65	Black	6	5.6	No	26	2	0	0	Yes
65-69	White	7	5.7	No	47	1	0	0	Yes
65-69	Black	6	5.8	Yes	93	1	0	0	Yes
<65	White	9	6	No	61	3	0	0	Yes
65-69	Black	7	6	No	90	2	0	0	Yes
<65	Others	7	6.1	No	38	3	0	0	Yes
<65	White	6	6.3	No	33	2	0	0	Yes
65-69	White	7	6.4	No	34	1	0	0	Yes
75-79	White	7	6.5	No	34	3	0	0	Yes
65-69	White	8	6.6	No	5	2	0	0	Yes
<65	White	6	6.8	No	41	1	0	0	Yes
70-74	White	6	6.9	No	30	1	0	0	Yes
70-74	White	7	7	Yes	93	1	0	0	Yes
65-69	White	7	7.2	No	97	2	0	0	Yes
<65	White	7	7.3	No	88	2	0	0	Yes
<65	Black	6	7.4	No	47	2	0	0	Yes
<65	Black	7	7.7	No	68	2	0	0	Yes
<65	White	6	7.9	No	85	3	0	0	Yes
<65	White	6	8.1	No	61	2	0	0	Yes
75-79	Black	7	8.3	No	3	1	0	0	Yes
<65	Black	6	8.5	No	73	1	0	0	Yes
<65	White	7	8.8	No	47	2	0	0	Yes
65-69	White	6	9	No	35	1	0	0	Yes
<65	White	7	9.5	No	70	2	0	0	Yes
<65	White	6	9.9	No	59	2	0	0	Yes
<65	White	6	0.6	No	61	1	0	0	Yes
75-79	White	6	2	No	66	2	0	0	Yes
70-74	Black	9	2.8	No	17	1	0	0	Yes
<65	White	6	3.8	No	68	1	0	0	Yes
65-69	White	6	4.1	No	30	2	0	0	Yes
<65	White	6	4.3	No	48	1	0	0	Yes
70-74	White	6	4.5	No	36	1	0	0	Yes
<65	White	6	4.8	No	59	1	0	0	Yes
<65	White	7	5	No	19	1	0	0	Yes
<65	White	9	5.3	No	22	1	0	1	Yes
65-69	White	6	5.7	No	89	1	0	0	Yes
<65	White	7	5.9	No	34	1	0	0	Yes
70-74	White	6	6.3	No	100	1	0	0	Yes
<65	White	6	6.7	No	48	1	0	0	Yes
75-79	White	7	7.3	No	37	1	0	0	Yes
70-74	White	6	7.7	No	79	1	0	0	Yes
70-74	White	6	8.3	Yes	29	1	0	0	Yes
65-69	White	6	9.2	No	32	1	0	0	Yes
<65	White	6	9.6	No	69	1	0	0	Yes
<65	White	7	4.7	Yes	24	3	0	0	No
<65	White	6	0.1	No	79	2	0	0	Yes
75-79	White	6	1.4	No	95	2	0	0	Yes
65-69	White	6	2.4	No	64	2	0	0	Yes
<65	White	6	3	No	33	2	0	0	Yes
<65	White	6	3.3	No	67	2	0	0	Yes
70-74	White	6	3.5	Yes	37	2	0	0	Yes
<65	White	7	3.7	No	44	1	0	0	Yes
<65	White	6	4	No	76	1	0	0	Yes
<65	Black	8	4.1	No	98	2	0	0	Yes
65-69	White	6	4.2	No	91	2	0	0	Yes
70-74	White	7	4.3	No	48	2	0	0	Yes
65-69	White	6	4.4	No	88	1	0	0	Yes
<65	White	7	4.4	No	96	2	0	0	Yes
65-69	White	8	4.5	No	34	1	0	0	Yes
<65	Black	6	4.6	No	82	1	0	0	Yes
65-69	White	7	4.7	No	100	3	0	0	Yes
<65	White	7	4.8	No	98	2	0	0	Yes
<65	White	7	4.9	No	47	2	0	0	Yes
<65	White	6	5	No	54	2	0	0	Yes
<65	White	6	5	No	89	2	0	0	Yes
75-79	White	7	5.1	No	40	1	0	0	Yes
<65	White	7	5.2	No	103	1	0	0	Yes
<65	White	6	5.3	No	72	1	0	0	Yes
70-74	Others	7	5.4	No	71	2	0	0	Yes
<65	White	6	5.5	No	107	2	0	0	Yes
<65	Black	6	5.6	No	83	1	0	0	Yes
70-74	Black	7	5.7	Yes	19	1	0	0	Yes
65-69	White	7	6	No	37	2	0	0	Yes
<65	White	8	6	No	87	3	0	0	Yes
<65	White	7	6.2	No	38	2	0	0	Yes
<65	White	6	6.3	No	105	2	0	0	Yes
<65	White	7	6.4	No	20	2	0	0	Yes
65-69	Black	7	6.6	No	88	1	0	0	Yes
70-74	White	6	6.7	No	89	1	0	0	Yes
65-69	White	6	6.8	No	80	3	0	0	Yes
<65	White	6	7	No	86	2	0	0	Yes
70-74	White	7	7.1	No	15	3	0	0	Yes
<65	White	7	7.2	No	76	2	0	0	Yes
65-69	White	6	7.4	No	11	2	0	0	Yes
70-74	Black	7	7.6	No	66	2	0	0	Yes
75-79	White	7	7.8	No	79	1	0	0	Yes
<65	White	6	7.9	No	87	2	0	0	Yes
75-79	White	6	8.1	No	62	1	0	0	Yes
70-74	White	6	8.3	No	94	1	0	0	Yes
<65	Black	7	8.5	No	74	3	0	0	Yes
<65	White	7	8.7	No	14	1	0	0	Yes
65-69	Others	6	9	No	107	2	0	0	Yes
70-74	White	7	9.3	No	30	2	0	0	Yes
65-69	Black	6	9.8	No	14	1	0	0	Yes
<65	White	6	0.8	No	33	2	0	0	Yes
65-69	White	6	2.1	No	91	1	0	0	Yes
70-74	White	6	2.7	No	95	1	0	0	Yes
<65	White	6	3.6	No	96	1	0	0	Yes
<65	White	6	4.1	Yes	7	1	0	0	Yes
70-74	Others	7	4.4	No	27	1	0	0	Yes
<65	Black	6	4.7	No	33	1	0	0	Yes
<65	Others	6	5	No	16	1	0	0	Yes
65-69	White	6	5.2	No	14	2	0	0	Yes
65-69	White	6	5.5	No	60	1	0	0	Yes
<65	White	6	5.7	No	27	1	0	0	Yes
<65	Black	6	5.8	No	8	1	0	0	Yes
<65	White	7	6	No	51	2	0	0	Yes
<65	White	7	6.3	No	40	2	0	0	Yes
65-69	White	6	6.6	No	18	1	0	0	Yes
<65	White	6	7	No	70	1	0	0	Yes
75-79	White	7	7.5	Yes	48	1	0	0	Yes
70-74	White	6	8.2	No	91	1	0	0	Yes
<65	White	6	9	No	91	2	0	0	Yes
<65	White	6	9.6	No	66	1	0	0	Yes
<65	White	7	3.8	No	70	3	0	0	No
<65	Black	7	8.4	No	33	3	0	0	No
<65	White	8	1.6	No	44	1	0	0	Yes
65-69	White	6	2.4	No	61	2	0	0	Yes
70-74	White	7	2.7	No	73	1	0	0	Yes
65-69	White	9	3.1	No	58	1	0	0	Yes
<65	White	6	3.5	No	90	2	0	0	Yes
<65	White	6	3.7	No	38	2	0	0	Yes
<65	White	7	4	No	62	1	0	0	Yes
<65	White	6	4.1	No	36	2	0	0	Yes
65-69	White	9	4.2	No	44	1	0	0	Yes
75-79	White	7	4.4	No	84	2	0	0	Yes
65-69	White	7	4.4	No	97	3	0	0	Yes
<65	White	6	4.5	No	68	2	0	0	Yes
<65	White	7	4.6	No	94	2	0	0	Yes
70-74	White	6	4.7	No	76	1	0	0	Yes
65-69	White	6	4.8	No	47	2	0	0	Yes
<65	White	7	4.9	No	72	3	0	0	Yes
75-79	White	7	5	No	88	1	0	1	Yes
<65	Others	6	5.1	No	76	2	0	0	Yes
65-69	White	6	5.2	No	19	2	0	0	Yes
65-69	White	7	5.2	No	99	1	0	0	Yes
65-69	White	6	5.3	No	24	2	0	0	Yes
75-79	Black	7	5.4	No	69	2	0	0	Yes
65-69	White	7	5.5	No	82	2	0	0	Yes
<65	Black	7	5.6	No	49	2	0	0	Yes
65-69	White	8	5.8	No	68	2	0	0	Yes
<65	Black	7	5.8	No	95	2	0	0	Yes
<65	White	7	5.9	No	35	2	0	0	Yes
65-69	White	7	6	No	81	2	0	0	Yes
70-74	Black	8	6.1	Yes	66	2	0	0	Yes
<65	Others	7	6.3	No	46	2	0	0	Yes
<65	White	7	6.5	No	19	2	0	0	Yes
70-74	White	6	6.6	No	93	3	0	0	Yes
65-69	White	7	6.7	No	47	1	0	0	Yes
<65	Others	7	6.9	No	44	1	0	0	Yes
<65	White	6	7	No	76	1	0	0	Yes
65-69	White	6	7.2	No	105	2	0	0	Yes
80-84	Others	7	7.3	No	29	3	1	0	Yes
<65	White	7	7.6	No	67	2	0	0	Yes
<65	White	6	7.8	No	92	2	0	0	Yes
80-84	Others	7	8	No	89	2	0	0	Yes
65-69	White	8	8.3	No	100	1	0	0	Yes
65-69	White	7	8.5	No	24	2	0	0	Yes
70-74	White	7	8.7	No	3	1	0	0	Yes
<65	White	6	9	No	101	2	0	0	Yes
<65	Black	7	9.3	No	25	2	0	0	Yes
65-69	White	7	9.8	No	15	2	0	0	Yes
<65	White	7	10	No	24	2	0	0	Yes
>85	White	9	1.1	Yes	31	2	0	0	Yes
<65	White	6	2.1	No	105	2	0	0	Yes
75-79	White	8	3.3	No	18	2	0	0	Yes
70-74	White	6	4	Yes	71	2	0	0	Yes
65-69	White	7	4.2	No	89	1	0	0	Yes
65-69	White	6	4.5	No	37	1	0	0	Yes
<65	Black	7	4.8	No	62	1	0	0	Yes
75-79	White	7	4.9	No	106	1	0	0	Yes
70-74	White	6	5	No	42	1	0	0	Yes
<65	White	7	5.4	No	38	1	0	0	Yes
65-69	White	6	5.6	No	30	1	0	0	Yes
65-69	White	6	5.9	No	81	1	0	0	Yes
65-69	White	6	6.2	Yes	94	1	0	0	Yes
70-74	White	8	6.4	Yes	15	1	1	1	Yes
65-69	Others	6	6.8	No	18	1	0	0	Yes
<65	White	7	7.1	No	26	2	0	0	Yes
70-74	White	6	7.4	No	37	1	0	0	Yes
65-69	White	7	7.8	No	73	1	0	0	Yes
70-74	White	6	8.1	No	20	1	0	0	Yes
65-69	White	6	9.1	No	27	1	0	0	Yes
65-69	White	9	9.5	No	44	2	0	0	Yes
<65	Black	7	4.4	No	97	2	0	0	No
<65	White	9	7.9	No	91	3	0	0	No
<65	White	7	1.2	No	105	2	0	0	Yes
80-84	White	9	2.3	No	33	3	0	0	Yes
75-79	White	6	3	No	87	1	0	0	Yes
<65	White	6	3.3	No	102	2	0	0	Yes
<65	White	7	3.6	No	107	2	0	0	Yes
<65	White	6	3.9	No	94	3	0	0	Yes
<65	White	7	4	No	75	2	0	0	Yes
<65	White	6	4.2	No	72	2	0	0	Yes
75-79	White	9	4.2	No	25	2	0	0	Yes
75-79	White	7	4.3	No	26	2	0	0	Yes
<65	White	6	4.4	No	83	2	0	0	Yes
<65	White	6	4.5	No	44	1	0	0	Yes
<65	White	6	4.6	No	95	2	0	0	Yes
65-69	Black	7	4.7	No	86	2	0	0	Yes
<65	White	7	4.8	No	62	2	0	0	Yes
65-69	White	7	4.9	No	68	1	0	0	Yes
<65	Black	7	5	No	52	1	0	0	Yes
65-69	White	7	5	No	14	2	0	0	Yes
<65	White	7	5.1	No	1	2	0	0	Yes
65-69	White	8	5.2	No	19	3	0	0	Yes
<65	White	7	5.3	No	96	2	0	0	Yes
<65	White	7	5.4	No	22	2	0	0	Yes
65-69	White	7	5.5	Yes	3	2	0	0	Yes
65-69	White	7	5.6	No	21	2	0	0	Yes
<65	Black	7	5.6	Yes	34	1	0	0	Yes
<65	White	6	5.7	No	58	2	0	0	Yes
<65	Others	9	5.8	No	15	3	1	0	Yes
<65	Black	8	6	No	58	2	0	0	Yes
<65	White	6	6	Yes	23	1	0	0	Yes
65-69	White	9	6.2	No	57	3	0	0	Yes
<65	White	7	6.3	No	35	1	0	0	Yes
75-79	White	7	6.4	No	35	2	0	0	Yes
65-69	White	7	6.5	No	20	1	0	0	Yes
75-79	White	9	6.6	No	13	2	0	0	Yes
<65	White	7	6.7	No	9	1	0	0	Yes
65-69	Black	7	6.9	No	40	2	0	0	Yes
65-69	White	7	7	No	63	2	0	0	Yes
70-74	White	7	7.1	No	21	1	0	0	Yes
65-69	White	6	7.2	No	32	1	0	0	Yes
65-69	White	7	7.5	No	91	3	1	0	Yes
<65	White	6	7.6	No	69	3	0	0	Yes
80-84	White	7	7.9	No	59	2	0	0	Yes
75-79	White	7	8.1	No	57	1	0	0	Yes
70-74	Black	7	8.3	No	105	3	0	0	Yes
70-74	White	7	8.5	No	72	1	0	0	Yes
75-79	Black	7	8.7	No	54	2	0	0	Yes
<65	White	6	9	No	99	1	0	0	Yes
65-69	White	8	9.4	No	93	2	0	0	Yes
<65	White	8	9.7	No	49	2	0	0	Yes
70-74	White	7	10	No	81	3	0	0	Yes
<65	White	6	1.5	No	39	2	0	0	Yes
75-79	White	7	2.4	No	55	1	0	0	Yes
>85	White	7	3	No	2	1	0	0	Yes
<65	Black	6	3.7	No	36	2	0	0	Yes
<65	White	6	4.1	No	54	1	0	0	Yes
70-74	White	6	4.4	No	15	1	0	0	Yes
<65	Black	6	4.6	Yes	37	1	0	0	Yes
<65	White	6	4.9	No	34	1	0	0	Yes
<65	White	6	5.2	No	52	1	0	0	Yes
65-69	White	6	5.5	No	75	2	0	0	Yes
<65	White	6	5.9	No	39	2	0	0	Yes
<65	Black	6	6.3	No	30	1	0	0	Yes
75-79	White	6	6.8	No	36	1	0	0	Yes
<65	White	6	7.3	No	29	1	0	0	Yes
<65	White	6	7.7	No	82	1	0	0	Yes
<65	White	6	8.4	No	16	1	0	0	Yes
<65	White	7	9	No	46	1	0	0	Yes
70-74	White	7	9.6	No	100	2	0	0	Yes
<65	White	9	2.5	No	32	3	0	0	No
<65	White	7	0.1	No	34	3	0	0	Yes
65-69	White	6	1.6	No	98	2	0	0	Yes
<65	White	6	2.4	No	58	2	0	0	Yes
<65	Black	7	2.9	No	83	3	0	0	Yes
75-79	White	7	3.2	No	69	2	0	0	Yes
75-79	White	7	3.5	No	23	1	0	0	Yes
<65	White	6	3.8	No	71	2	0	0	Yes
75-79	White	7	4	Yes	59	2	0	0	Yes
70-74	Black	6	4.1	No	106	2	0	0	Yes
<65	White	6	4.2	No	89	2	0	0	Yes
<65	White	6	4.3	No	88	2	0	0	Yes
75-79	White	8	4.4	No	97	1	0	0	Yes
<65	Others	6	4.5	No	61	1	0	0	Yes
65-69	Black	6	4.6	No	99	2	0	0	Yes
65-69	White	7	4.7	No	32	1	0	0	Yes
<65	White	6	4.7	No	98	1	0	0	Yes
65-69	White	7	4.8	No	99	2	0	0	Yes
70-74	White	7	4.9	No	38	1	0	0	Yes
<65	White	7	5.1	No	36	2	0	0	Yes
65-69	White	7	5.2	No	19	1	0	0	Yes
<65	Black	7	5.2	No	103	2	0	0	Yes
65-69	White	7	5.3	No	81	1	0	0	Yes
70-74	White	7	5.4	No	51	2	0	0	Yes
<65	White	8	5.5	Yes	77	2	0	0	Yes
<65	White	6	5.6	No	87	2	0	0	Yes
<65	White	7	5.7	No	102	2	0	0	Yes
65-69	Others	7	5.8	No	82	2	0	0	Yes
70-74	White	7	5.9	No	29	1	0	0	Yes
70-74	White	7	6	No	37	3	0	0	Yes
<65	Black	7	6.1	No	81	2	0	0	Yes
<65	White	7	6.2	Yes	11	2	0	0	Yes
<65	White	6	6.3	No	21	2	0	0	Yes
65-69	White	7	6.4	Yes	17	2	0	0	Yes
70-74	White	8	6.6	No	22	2	0	0	Yes
70-74	White	8	6.7	No	76	3	0	0	Yes
65-69	White	7	6.8	No	20	3	0	0	Yes
<65	Black	6	6.9	No	92	2	0	0	Yes
<65	White	7	7.1	No	2	2	0	0	Yes
65-69	White	7	7.2	No	11	4	0	0	Yes
65-69	White	7	7.4	No	35	2	0	0	Yes
<65	White	8	7.5	No	16	3	0	0	Yes
65-69	Black	6	7.7	Yes	38	1	0	0	Yes
<65	Black	7	7.9	No	22	3	0	0	Yes
<65	White	6	8	No	82	2	0	0	Yes
65-69	White	6	8.2	No	9	1	0	0	Yes
<65	White	6	8.5	No	73	2	0	0	Yes
65-69	White	7	8.9	No	33	2	0	0	Yes
<65	White	9	9.2	No	32	3	1	0	Yes
75-79	White	7	9.5	No	70	2	0	0	Yes
70-74	White	7	9.8	No	93	1	0	0	Yes
65-69	White	6	0.5	No	98	2	0	0	Yes
65-69	White	8	1.9	Yes	3	2	0	0	Yes
<65	White	7	3	No	94	1	0	0	Yes
<65	Black	6	3.6	No	27	1	0	0	Yes
<65	Black	6	4.2	No	102	1	0	0	Yes
<65	White	6	4.3	No	69	1	0	0	Yes
<65	White	6	4.7	No	104	2	0	0	Yes
<65	Black	6	4.9	No	60	1	0	0	Yes
<65	White	6	5	No	23	3	0	0	Yes
<65	White	6	5.2	No	75	1	0	0	Yes
<65	White	6	5.6	No	21	1	0	0	Yes
70-74	White	7	6	Yes	18	1	0	0	Yes
65-69	White	6	6.2	No	28	1	0	0	Yes
70-74	White	7	6.8	No	17	2	0	0	Yes
70-74	Black	8	7	No	20	1	0	0	Yes
65-69	White	6	7.7	No	83	1	0	0	Yes
<65	White	7	8.5	No	19	2	0	0	Yes
>85	White	6	8.7	Yes	67	1	0	0	Yes
70-74	White	8	9.5	Yes	34	2	0	0	Yes
<65	White	10	5.4	Yes	32	3	0	0	No
<65	White	7	0.1	Yes	10	3	0	0	Yes
<65	White	6	1.9	No	76	2	0	0	Yes
<65	White	7	2.4	No	50	2	0	0	Yes
80-84	White	7	2.9	No	11	1	0	0	Yes
<65	Others	8	3.3	No	104	2	0	0	Yes
70-74	White	6	3.5	No	18	3	0	0	Yes
65-69	White	7	3.7	No	47	2	0	0	Yes
<65	White	7	4	No	91	2	0	0	Yes
<65	White	6	4.1	No	93	2	0	0	Yes
<65	Others	6	4.2	No	105	2	0	0	Yes
<65	White	8	4.3	No	43	3	0	0	Yes
65-69	White	6	4.4	No	21	2	0	0	Yes
<65	Black	6	4.5	No	90	1	0	0	Yes
<65	White	6	4.6	Yes	79	2	0	0	Yes
65-69	White	7	4.7	No	13	2	0	0	Yes
<65	White	7	4.7	Yes	57	2	0	0	Yes
65-69	White	7	4.8	No	51	1	0	0	Yes
65-69	White	9	4.9	No	61	3	0	0	Yes
<65	White	9	5	No	54	3	0	0	Yes
<65	White	6	5	No	42	1	0	0	Yes
65-69	White	6	5.1	No	70	1	0	0	Yes
<65	Black	7	5.2	No	93	2	0	0	Yes
65-69	White	7	5.3	No	50	1	0	0	Yes
65-69	White	7	5.4	No	96	2	0	0	Yes
<65	White	6	5.5	No	75	1	0	0	Yes
65-69	White	8	5.6	No	20	3	0	0	Yes
<65	Black	6	5.7	No	105	1	0	0	Yes
<65	White	6	5.8	No	85	2	0	0	Yes
<65	White	8	6	No	72	3	0	0	Yes
<65	White	7	6.1	No	63	2	0	0	Yes
<65	White	7	6.2	No	103	2	0	0	Yes
65-69	White	9	6.3	No	94	3	0	1	Yes
<65	White	8	6.4	No	23	1	0	0	Yes
65-69	White	7	6.5	No	82	3	0	0	Yes
<65	White	7	6.7	No	74	2	0	0	Yes
70-74	White	9	6.8	No	13	3	0	0	Yes
70-74	White	8	6.9	Yes	45	1	0	0	Yes
65-69	White	6	7	No	90	1	0	0	Yes
<65	White	7	7.1	No	91	1	0	0	Yes
70-74	White	6	7.3	No	76	1	0	0	Yes
70-74	Others	8	7.5	No	89	1	0	0	Yes
<65	White	7	7.7	No	86	2	0	0	Yes
65-69	White	9	7.9	Yes	16	1	1	1	Yes
70-74	White	8	8.1	No	15	2	0	0	Yes
65-69	White	6	8.3	No	98	1	0	0	Yes
65-69	White	6	8.5	No	69	1	0	0	Yes
<65	White	7	8.7	No	63	2	0	0	Yes
<65	White	7	8.9	No	43	2	0	0	Yes
65-69	White	6	9.2	No	100	1	0	0	Yes
<65	White	7	9.5	No	40	3	1	0	Yes
75-79	White	7	9.8	Yes	20	1	0	0	Yes
<65	Others	6	0.5	No	107	2	0	0	Yes
>85	White	6	1.4	No	80	1	0	0	Yes
65-69	White	7	2.8	No	20	1	0	0	Yes
<65	White	6	3.6	No	79	1	0	0	Yes
65-69	White	6	4	No	86	1	0	0	Yes
<65	Black	6	4.3	No	85	1	0	0	Yes
<65	Black	6	4.5	No	40	1	0	0	Yes
70-74	White	6	4.9	No	107	1	0	0	Yes
65-69	White	6	5.1	No	88	1	0	0	Yes
65-69	Black	7	5.4	Yes	51	2	0	0	Yes
<65	White	7	5.8	No	67	1	0	0	Yes
75-79	White	6	5.9	No	61	1	0	0	Yes
65-69	White	6	6.3	No	23	1	0	0	Yes
<65	White	6	6.9	No	35	1	0	0	Yes
80-84	White	9	7.4	Yes	11	4	1	1	Yes
75-79	White	7	7.8	No	63	2	0	0	Yes
<65	White	6	8.5	No	78	1	0	0	Yes
<65	White	6	9.3	No	32	2	0	0	Yes
<65	Black	7	1.8	No	26	3	0	0	No
65-69	White	6	6.9	No	33	2	0	0	No
75-79	White	7	0.8	No	25	1	0	0	Yes
65-69	White	6	1.9	No	73	2	0	0	Yes
<65	White	7	2.5	No	64	2	0	0	Yes
<65	White	6	2.8	No	8	3	0	0	Yes
70-74	White	7	3.2	No	80	2	0	0	Yes
<65	White	6	3.5	No	89	2	0	0	Yes
<65	White	6	3.8	No	71	2	0	0	Yes
<65	White	7	4	No	63	1	0	0	Yes
65-69	White	7	4.1	No	48	2	0	0	Yes
<65	White	7	4.2	No	64	3	0	0	Yes
65-69	White	8	4.3	No	76	2	0	0	Yes
65-69	White	6	4.5	No	91	2	0	0	Yes
65-69	White	8	4.6	No	38	2	0	0	Yes
70-74	White	8	4.6	No	76	3	1	0	Yes
75-79	White	7	4.7	No	99	1	0	0	Yes
<65	White	6	4.8	No	51	3	0	0	Yes
65-69	White	7	4.9	No	83	2	0	0	Yes
70-74	Others	7	5	No	85	2	1	0	Yes
<65	White	7	5.1	No	26	2	0	0	Yes
65-69	White	6	5.1	No	79	2	0	0	Yes
75-79	Black	7	5.2	No	47	1	0	0	Yes
70-74	White	7	5.3	No	50	1	0	0	Yes
75-79	White	7	5.4	Yes	16	2	0	0	Yes
<65	White	7	5.5	No	68	2	0	0	Yes
<65	White	6	5.5	No	80	2	0	0	Yes
65-69	White	9	5.6	No	26	2	0	0	Yes
65-69	White	6	5.7	No	99	1	0	0	Yes
<65	Black	8	5.8	Yes	94	1	0	0	Yes
80-84	White	7	5.9	No	28	2	0	0	Yes
65-69	White	6	6.1	No	100	1	0	0	Yes
65-69	White	7	6.2	Yes	49	2	0	0	Yes
<65	White	6	6.3	No	88	1	0	0	Yes
<65	White	6	6.4	No	67	2	0	0	Yes
<65	White	6	6.5	No	82	3	0	0	Yes
65-69	White	8	6.7	No	77	1	0	0	Yes
<65	White	7	6.9	No	57	2	0	0	Yes
65-69	White	6	7	No	101	2	0	0	Yes
65-69	White	9	7.1	No	15	3	0	0	Yes
<65	White	7	7.3	No	88	2	0	0	Yes
[truncated: 231,555+ more rows]
